# Supplementary material for: Direct acylation of N-benzyltriflamides from the alcohol oxidation level via palladium-catalyzed C–H bond activation
Source: Royal Society of Chemistry journal article supplement (doi:10.1039/c3ob40140e), 2013-01-01

## Supplementary Information

### Direct acylation of *N*-benzyltriflamides from the alcohol oxidation level via palladium-catalyzed C–H bond activation

Jihye Park,<sup>a</sup> Aejin Kim,<sup>a</sup> Satyasheel Sharma,<sup>a,b</sup> Minyoung Kim,<sup>a</sup> Eonjeong Park,<sup>a</sup> Yukyoung Jeon,<sup>a</sup> Youngil Lee,<sup>b</sup> Jong Hwan Kwak,<sup>a</sup> Young Hoon Jung<sup>a</sup> and In Su Kim<sup>a,\*</sup>

<sup>a</sup> School of Pharmacy, Sungkyunkwan University, Suwon 440-746, Republic of Korea

<sup>b</sup> Department of Chemistry, University of Ulsan, Ulsan 680-749, Republic of Korea.

\* Corresponding author. Tel.: +82-31-290-7788; fax: +82-31-292-8800; e-mail: [insukim@skku.edu](mailto:insukim@skku.edu)

#### List of the Contents

<sup>1</sup>H NMR and <sup>13</sup>C NMR copies of all products (3a-k, 4b-l) -----S2–S23

SpinWorks 3: JH 656

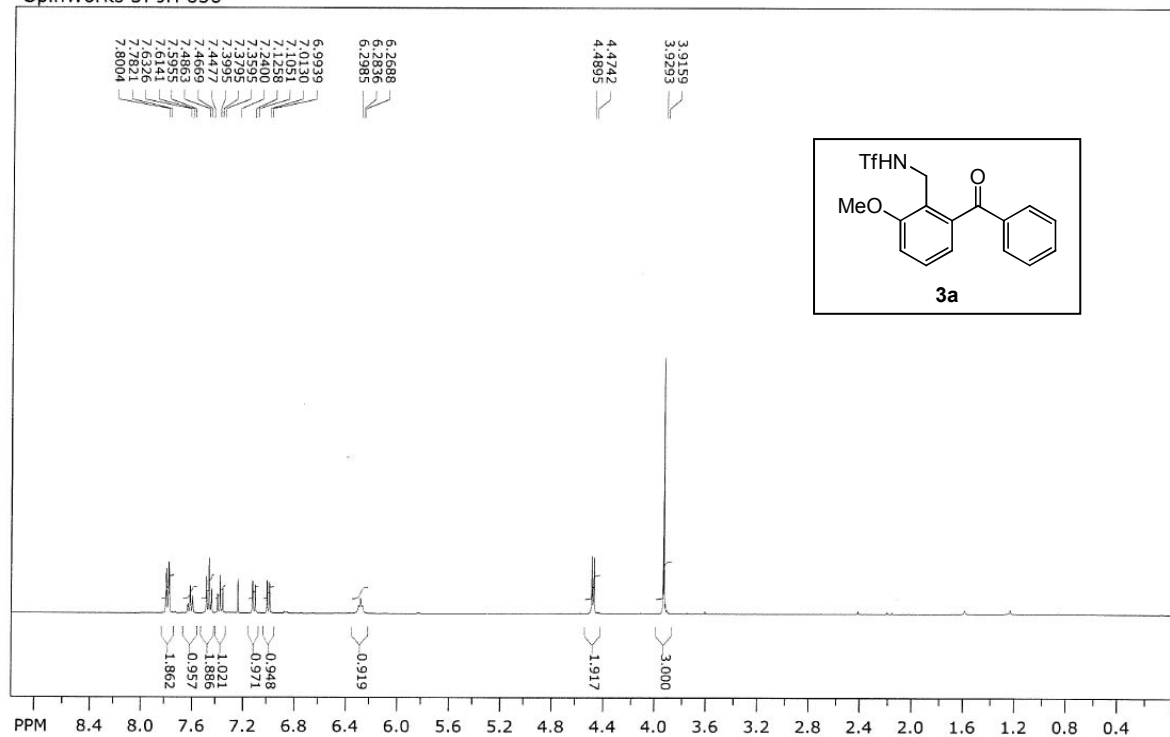

SpinWorks 3: JH 656

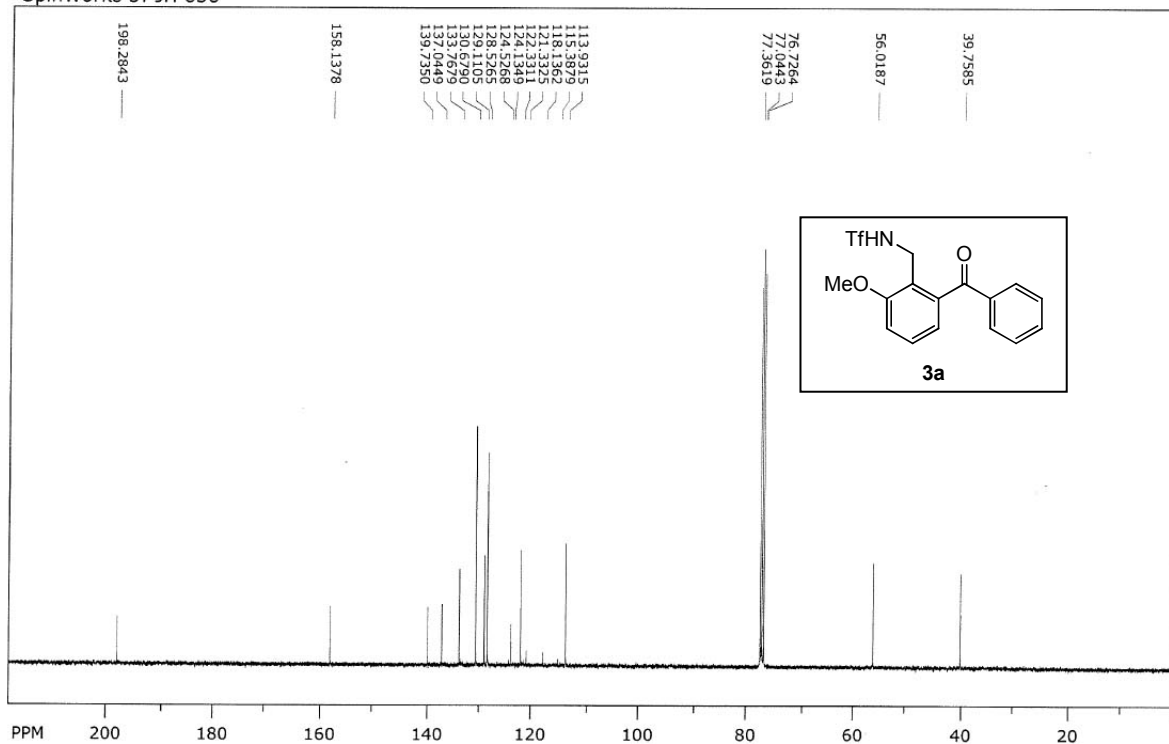

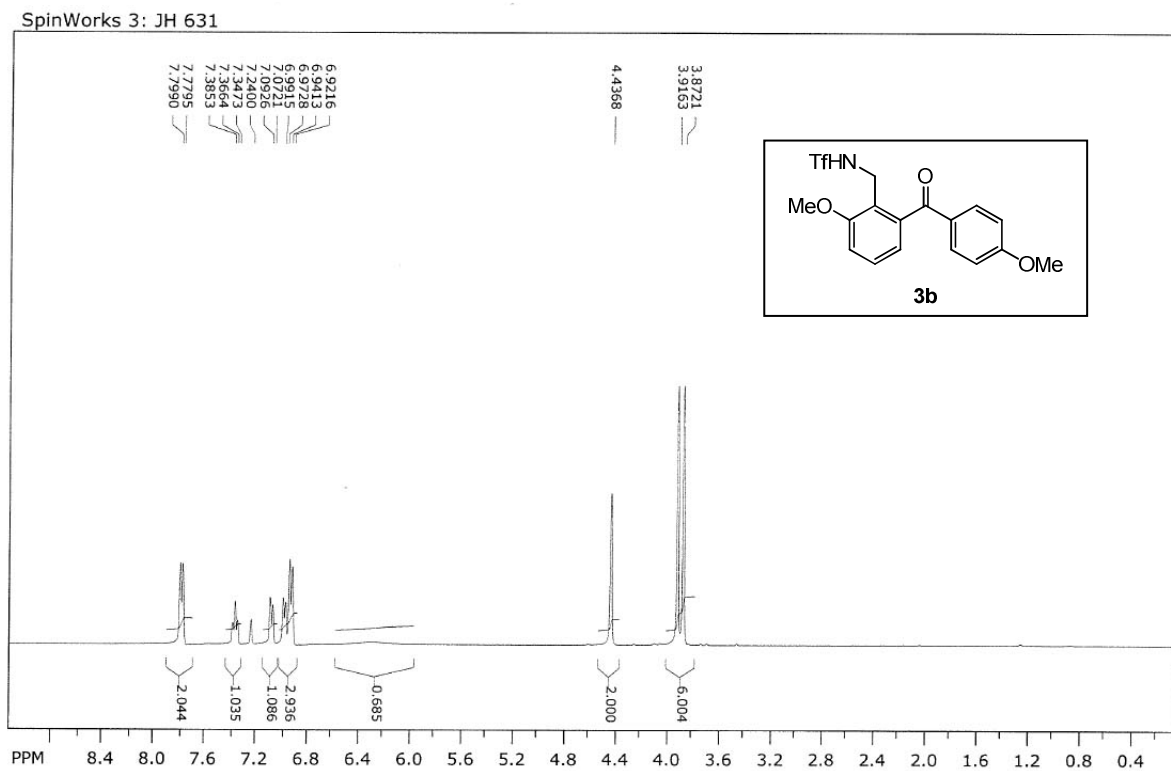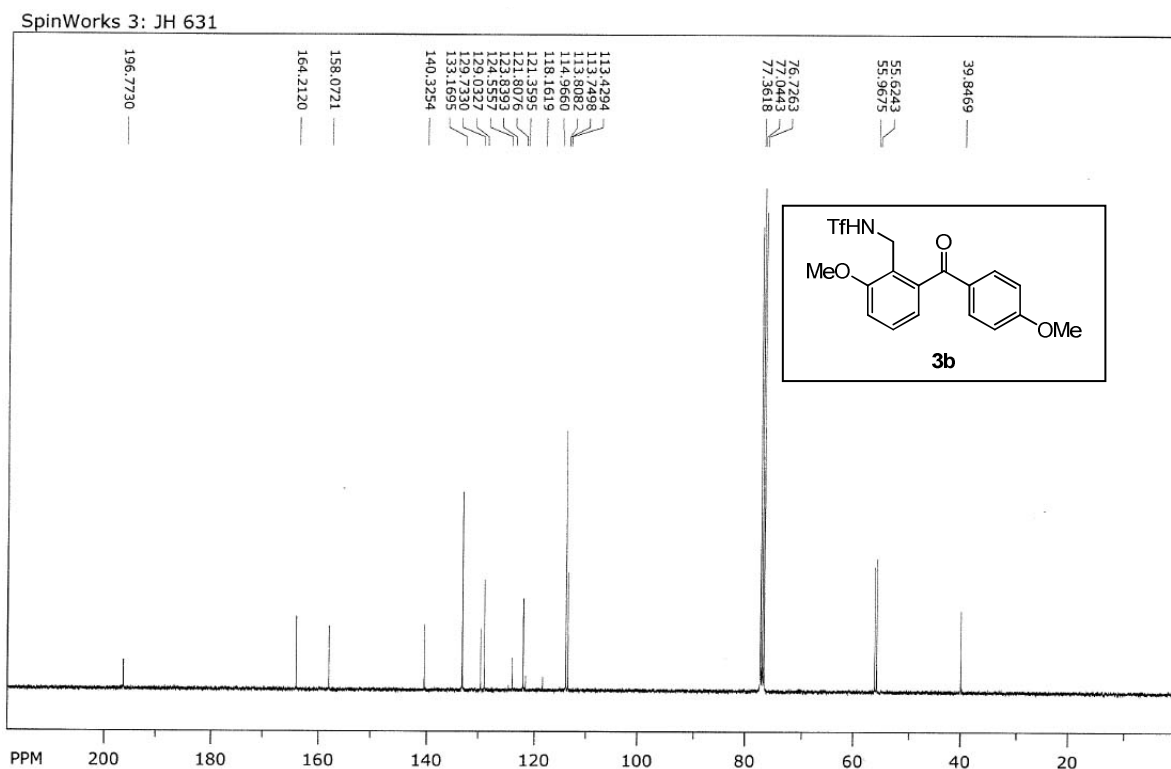

SpinWorks 3: JH 635

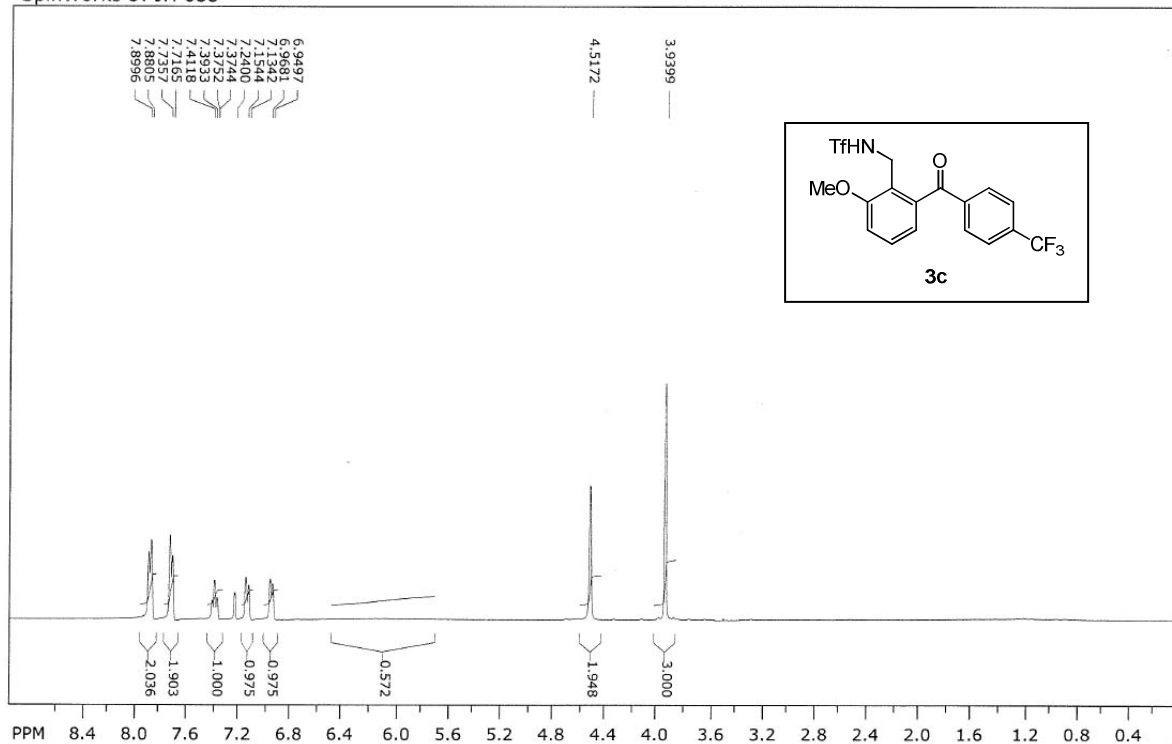

SpinWorks 3: JH 635

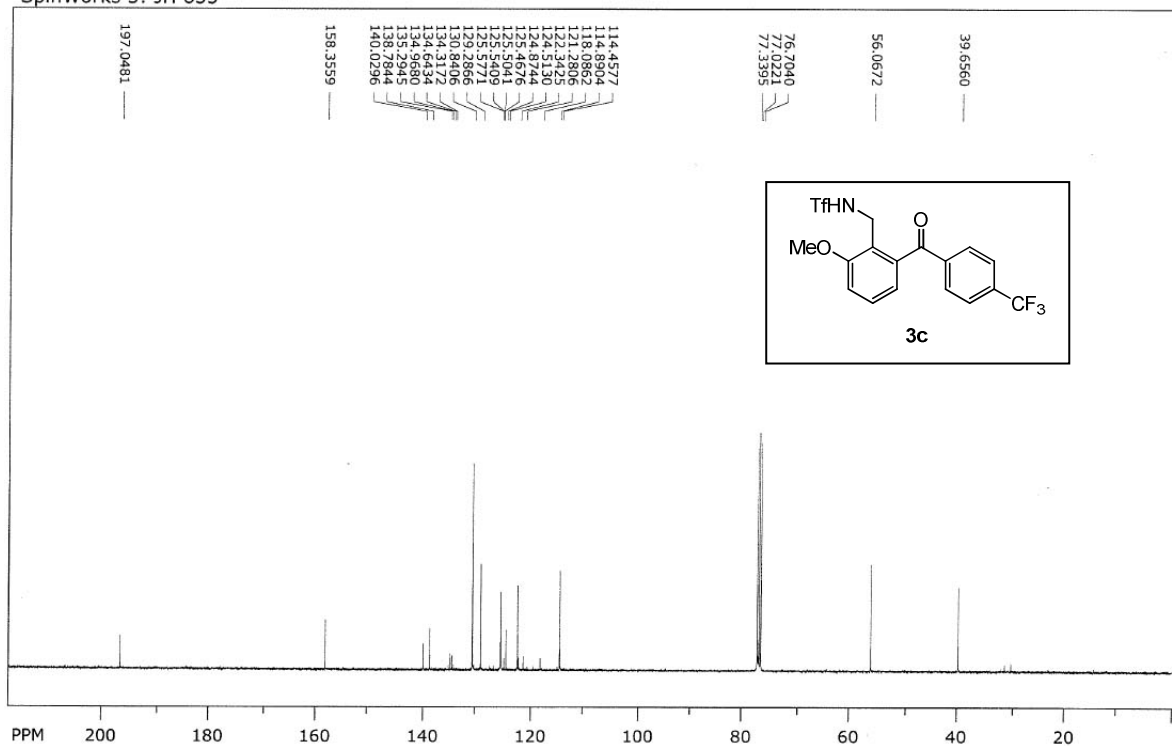

SpinWorks 3: JH 632

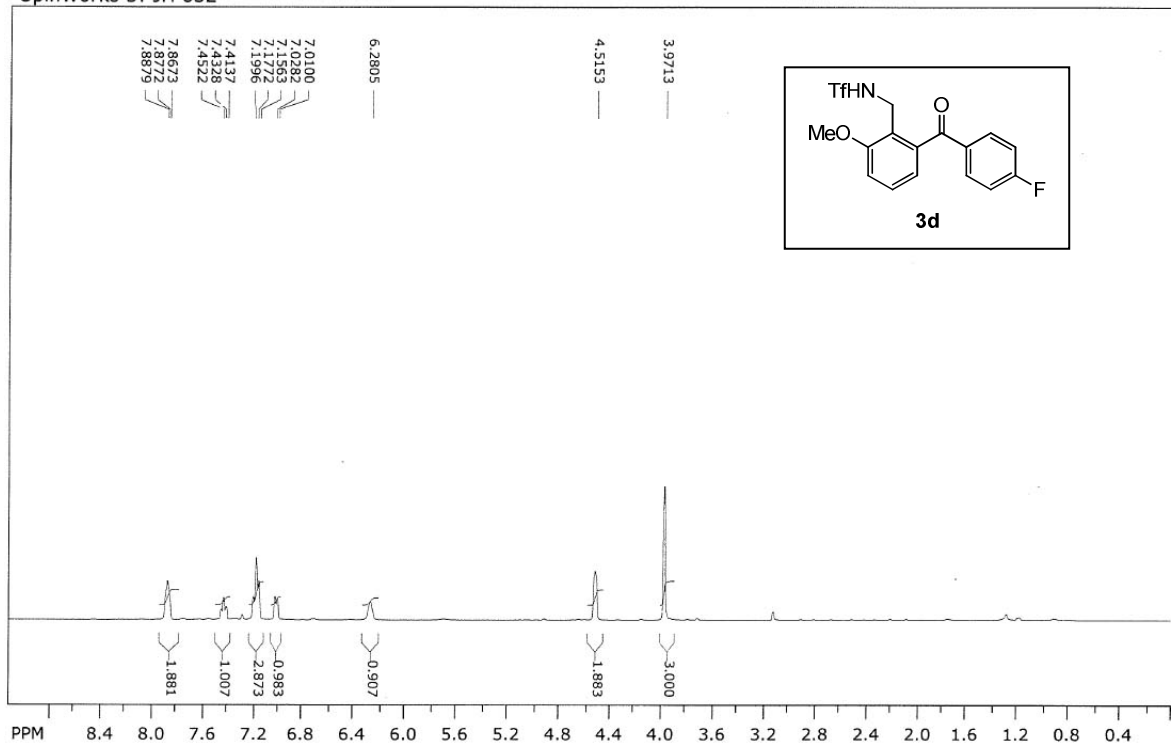

SpinWorks 3: JH 632

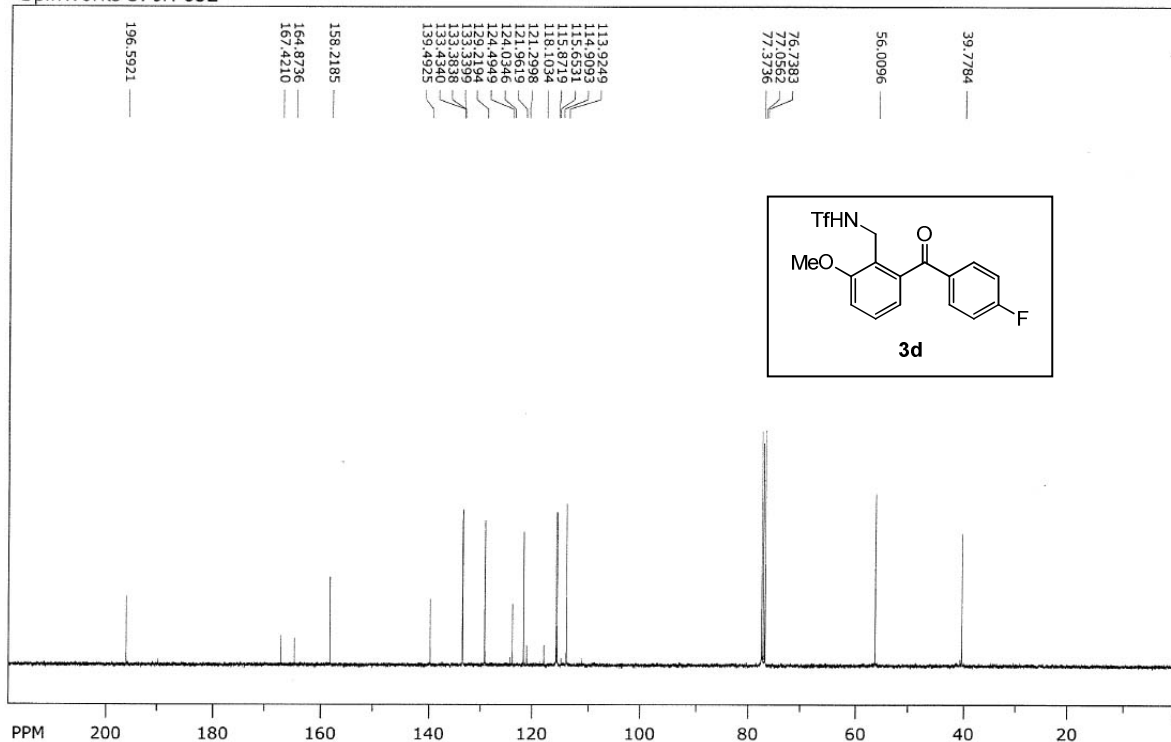

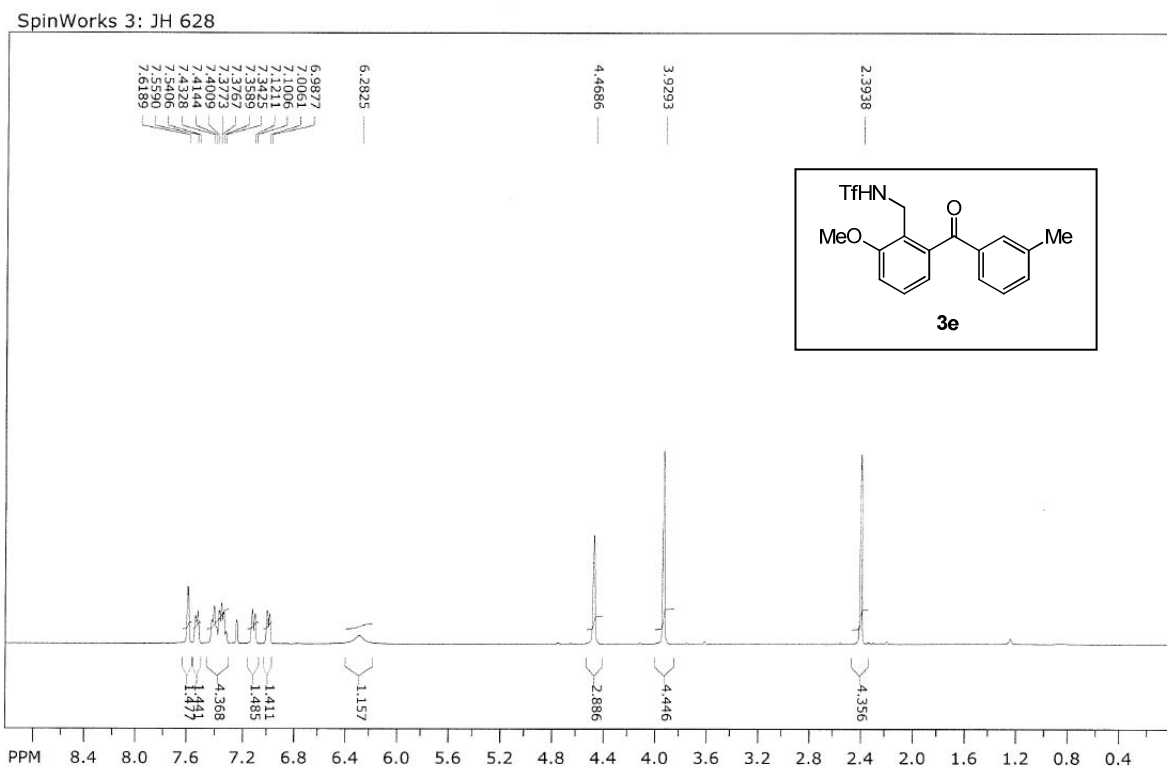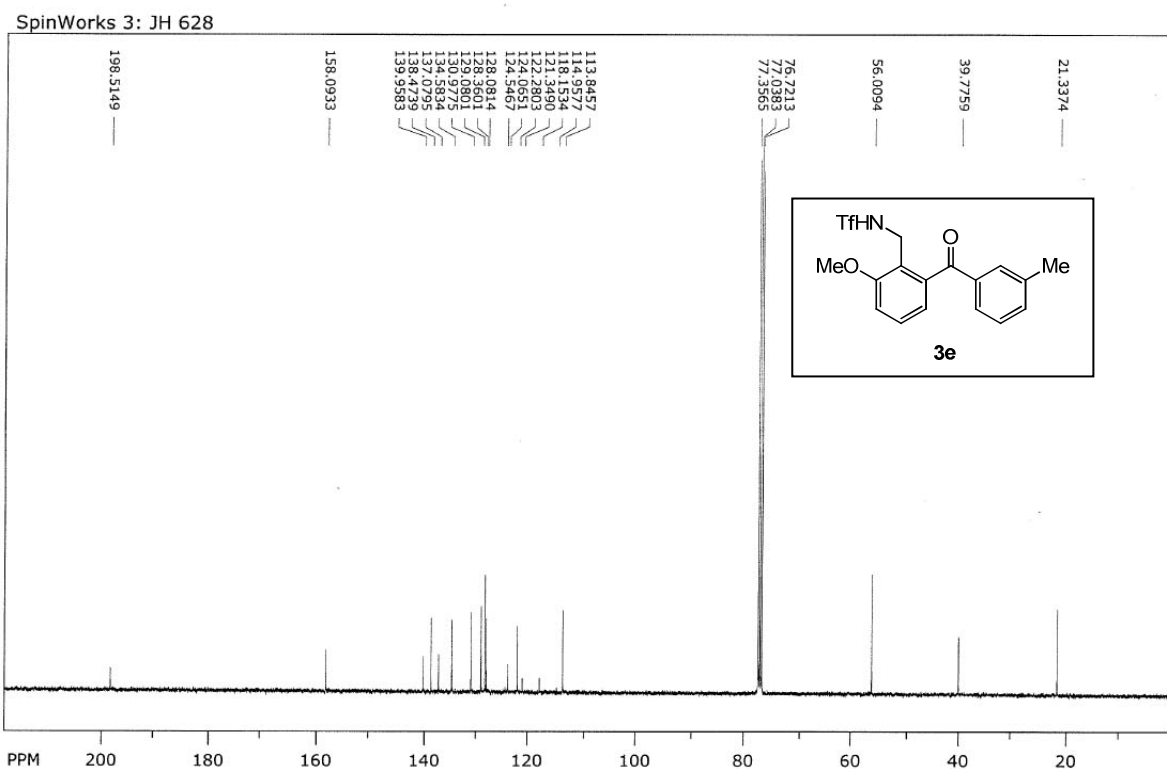

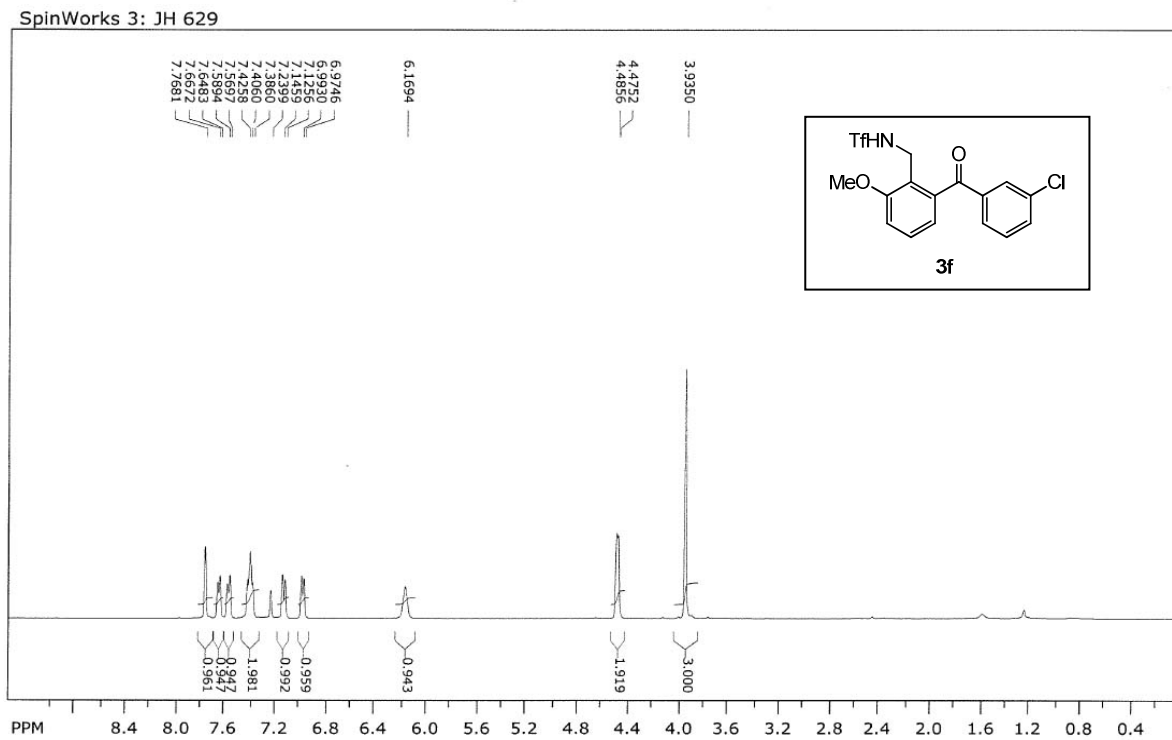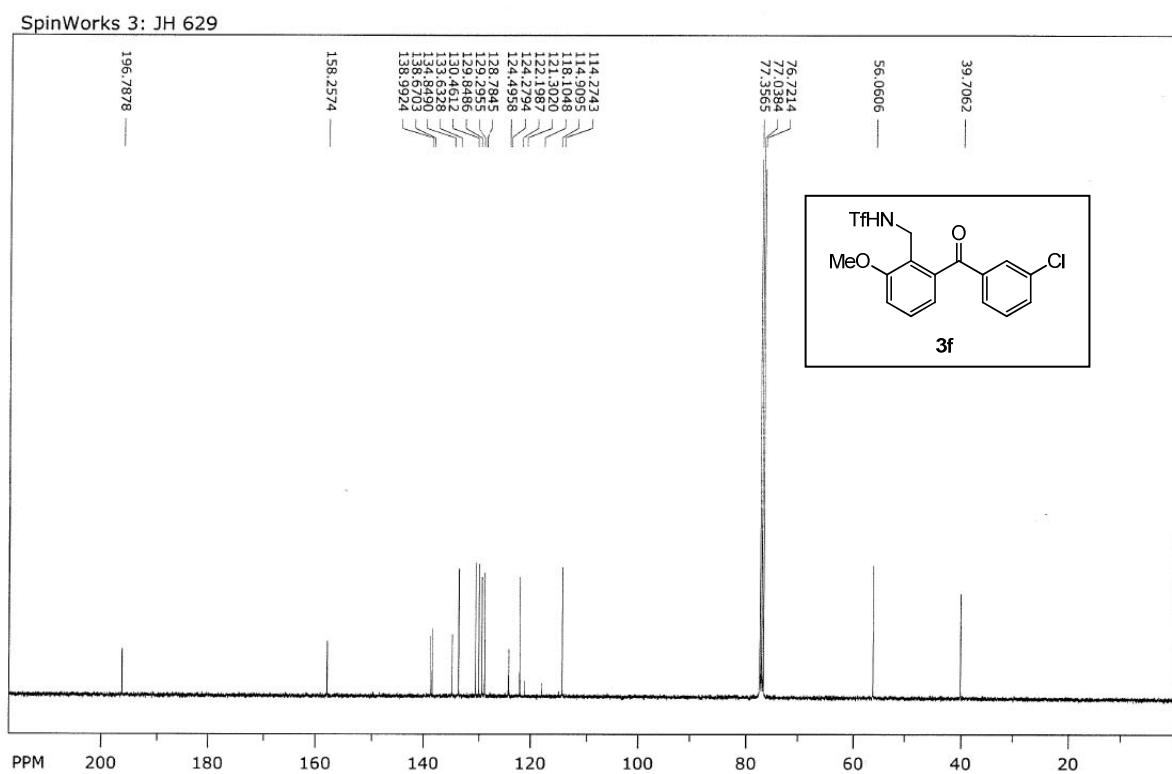

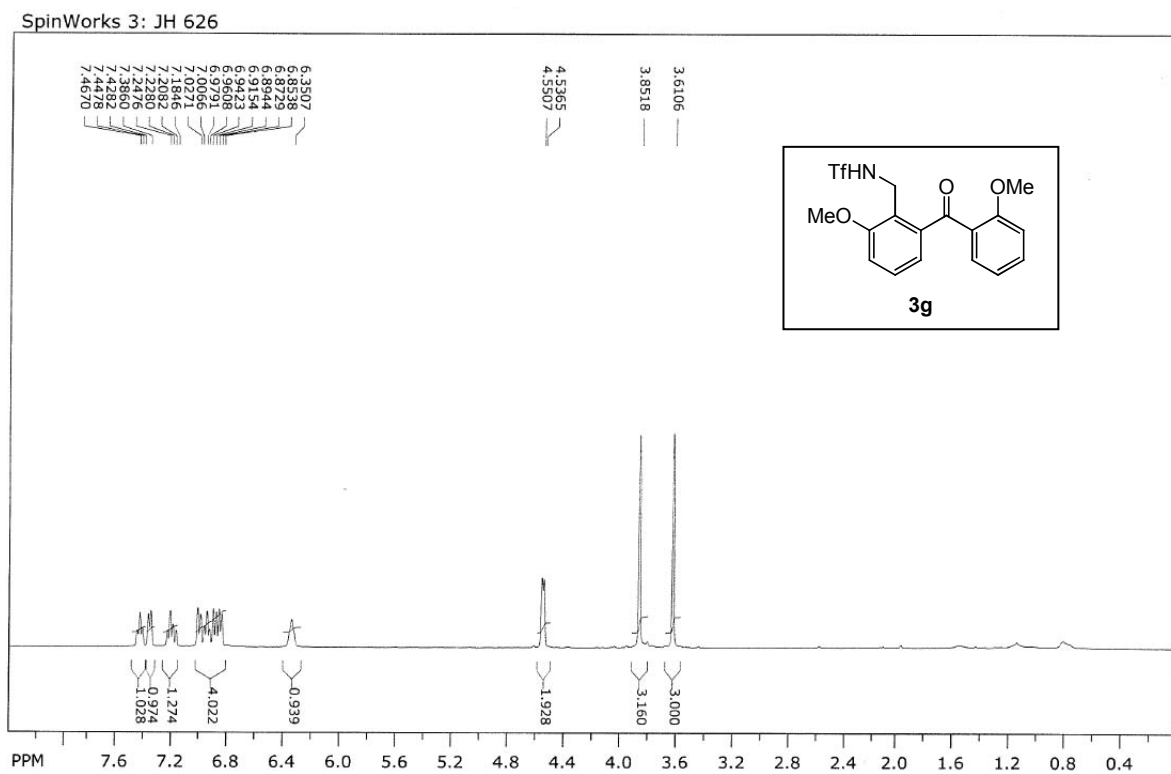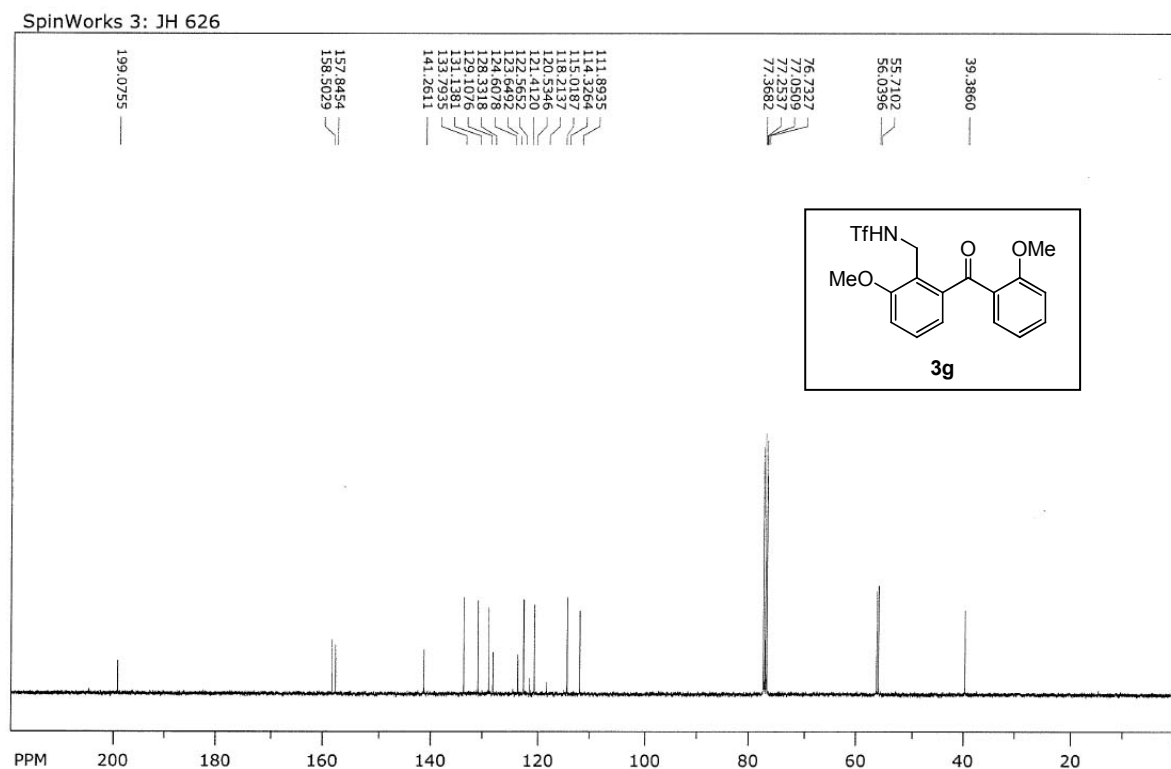



SpinWorks 3: JH 659

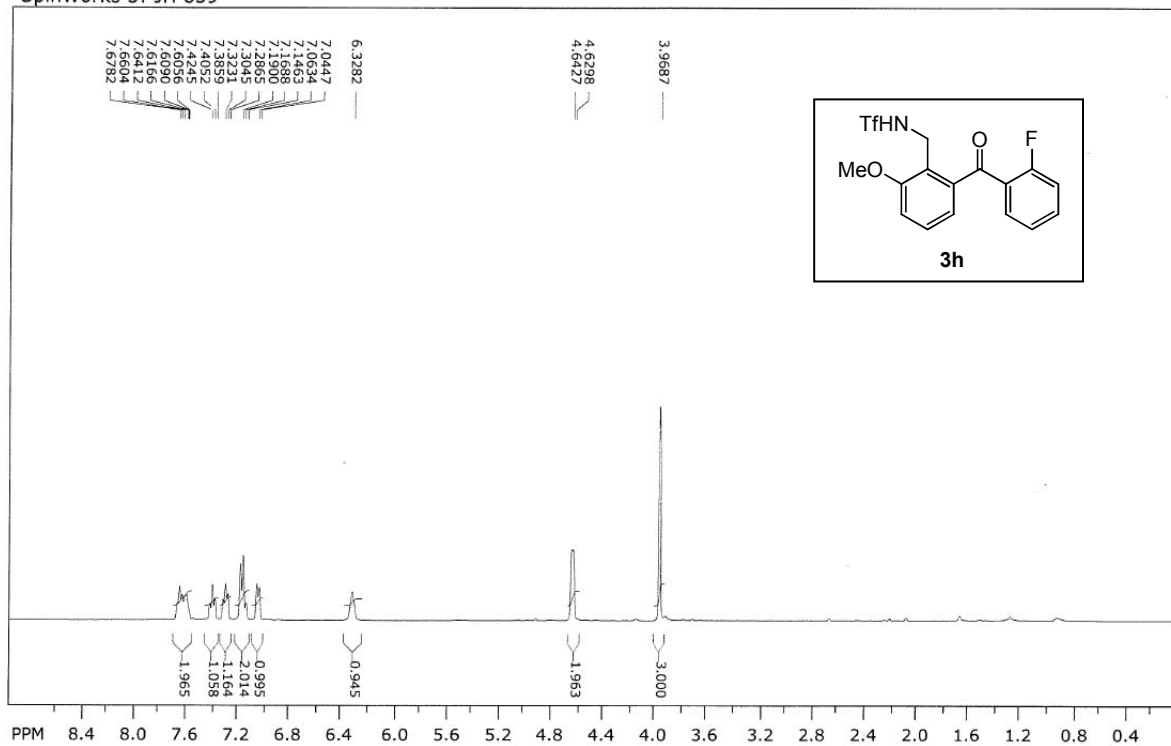

SpinWorks 3: JH 659

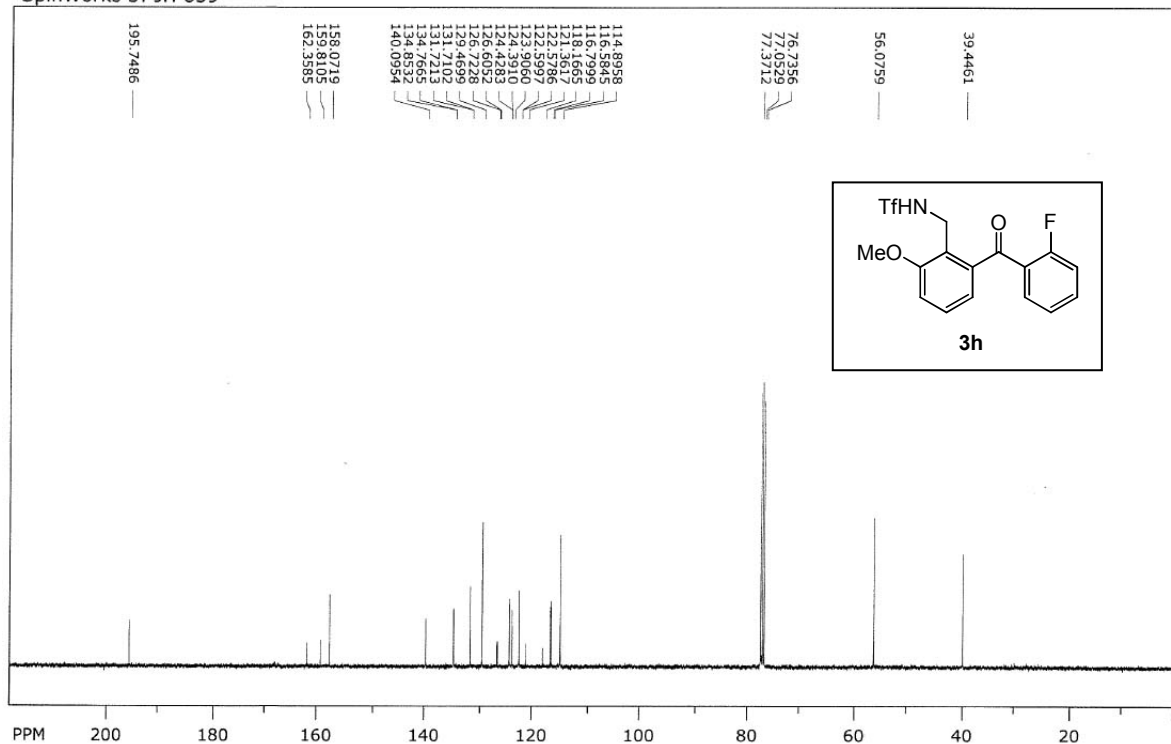

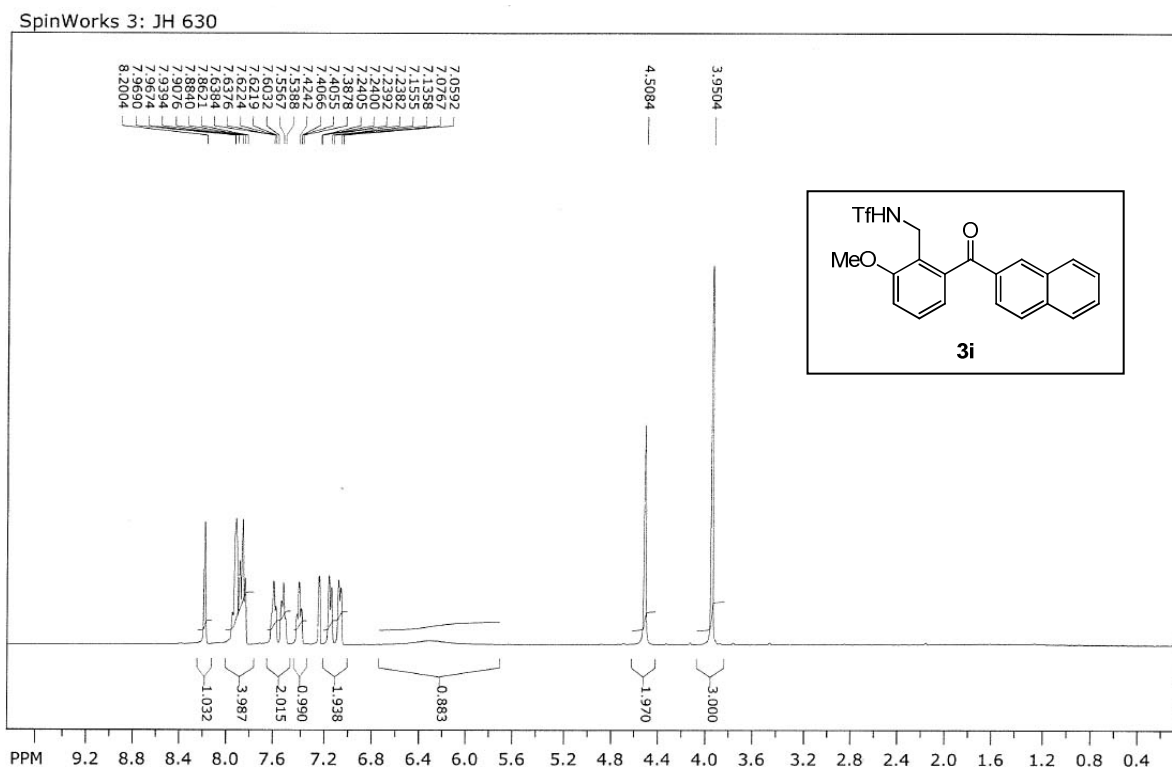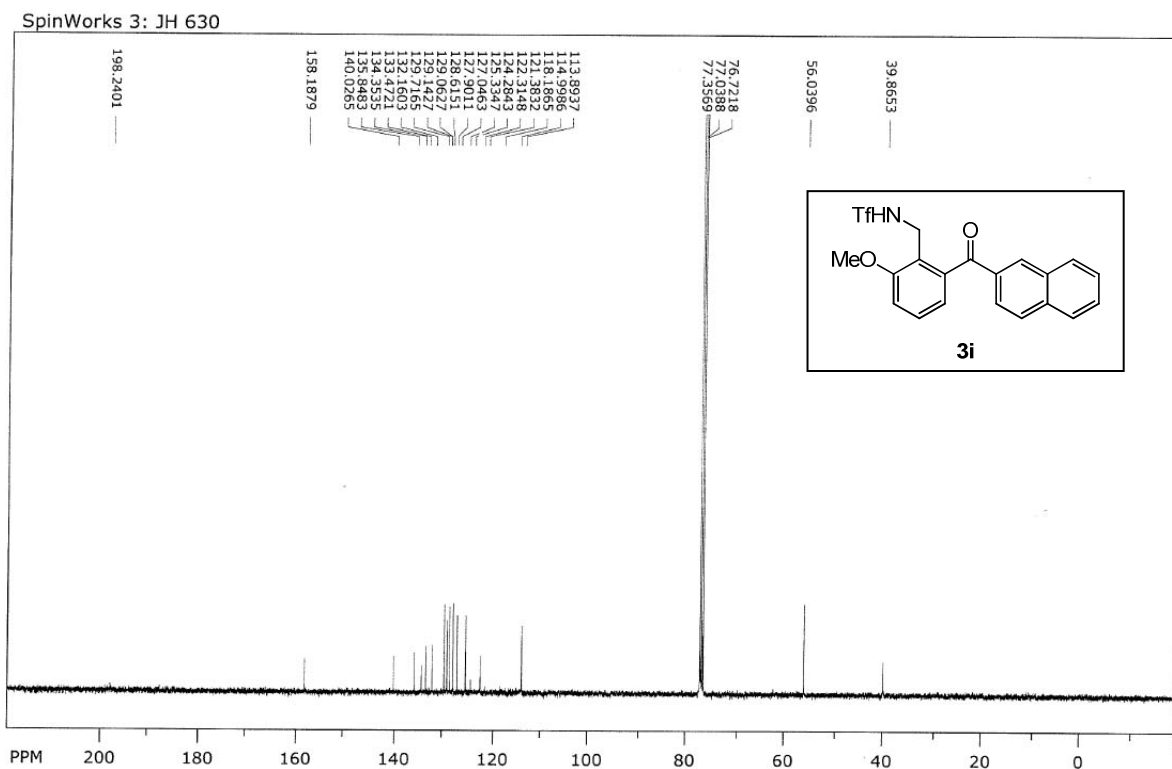

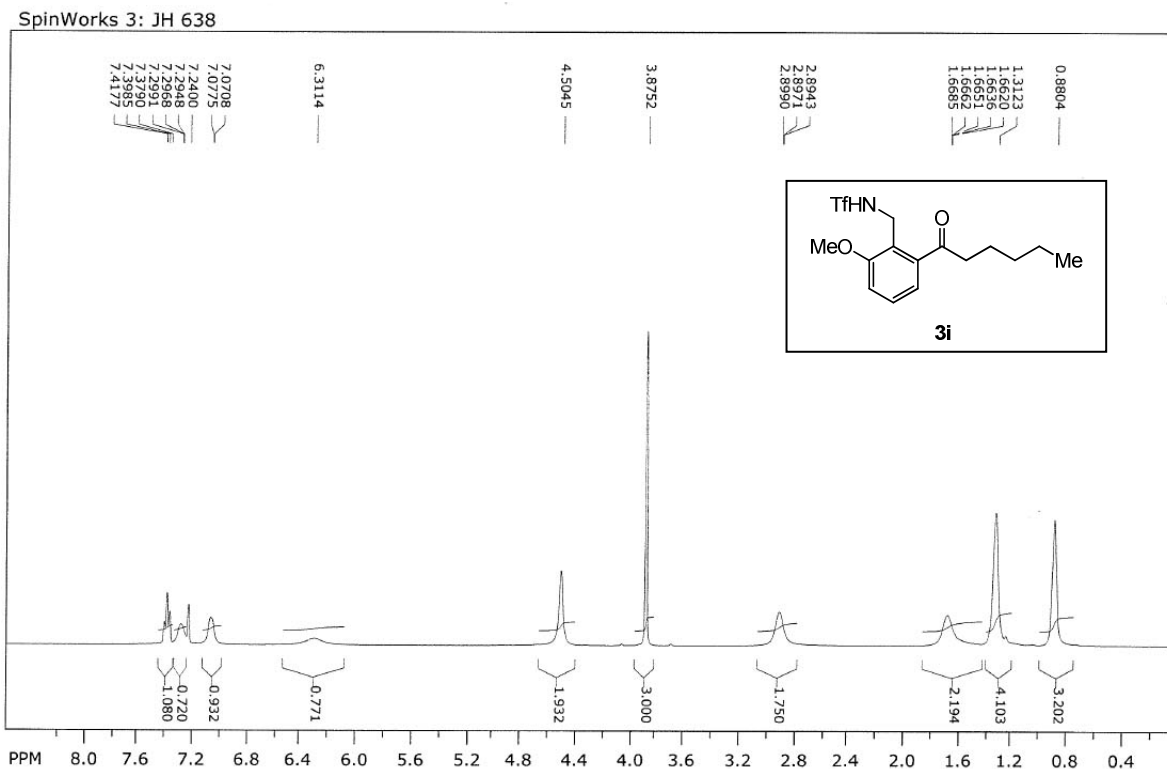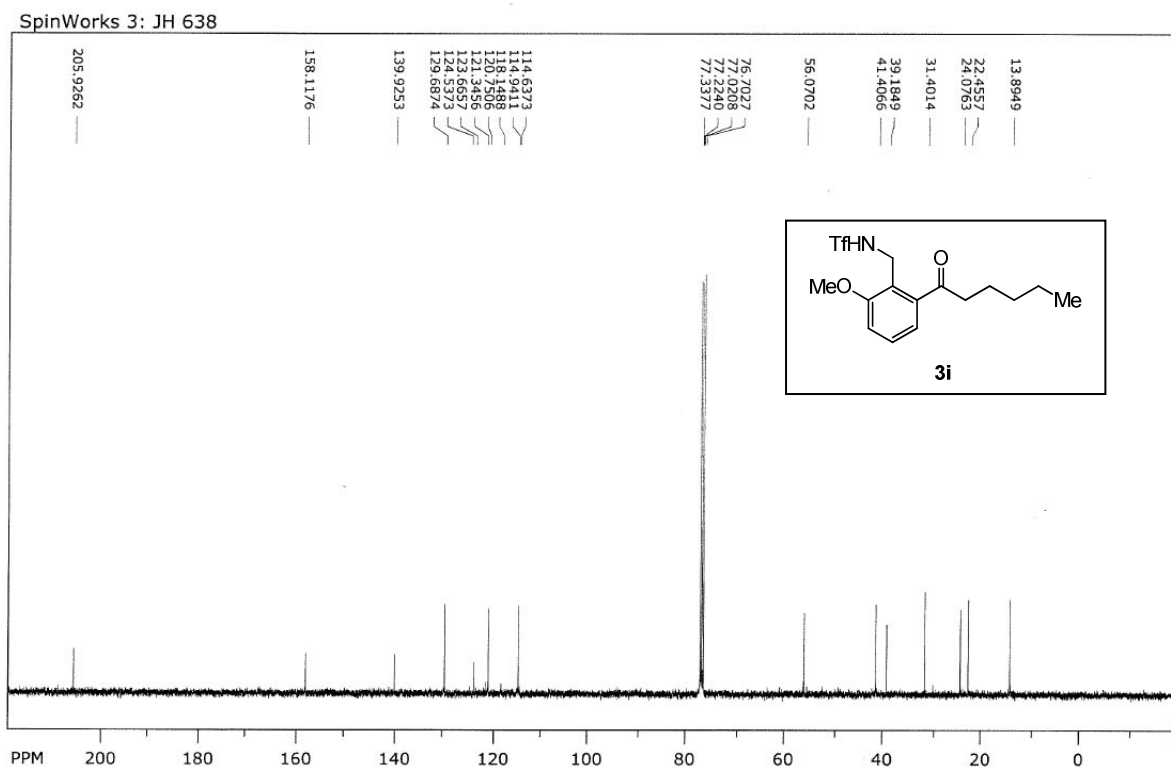

SpinWorks 3: JH 666

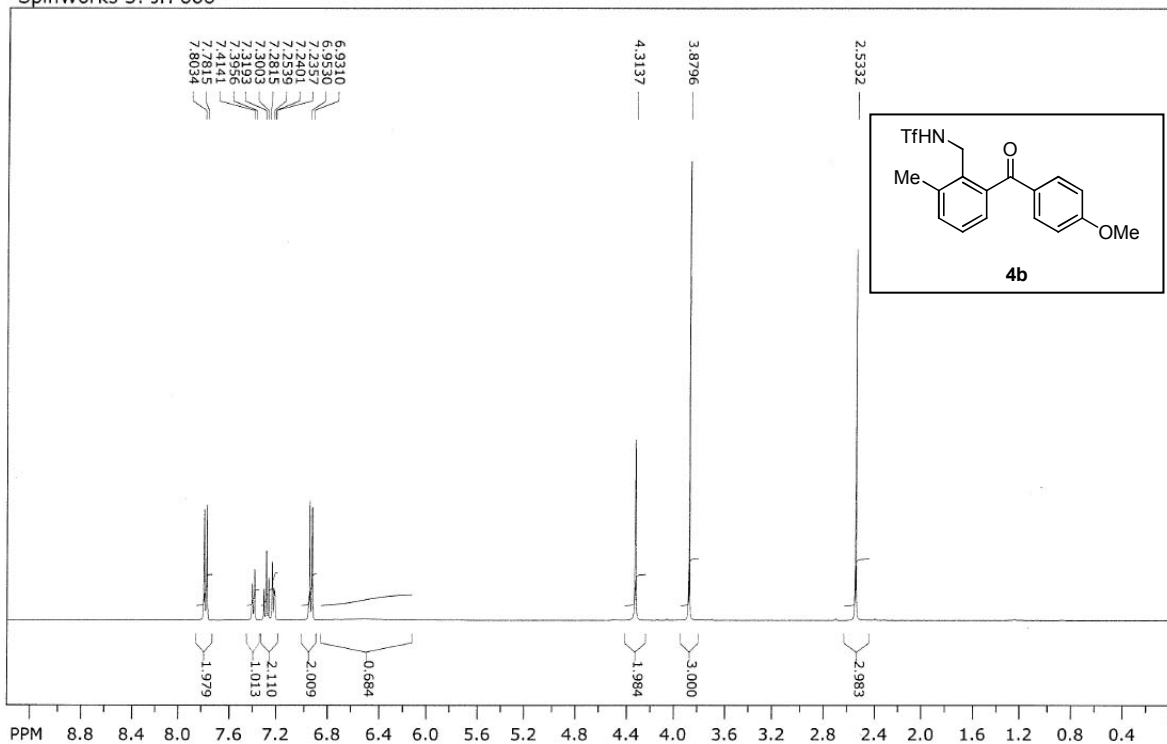

SpinWorks 3: JH 666

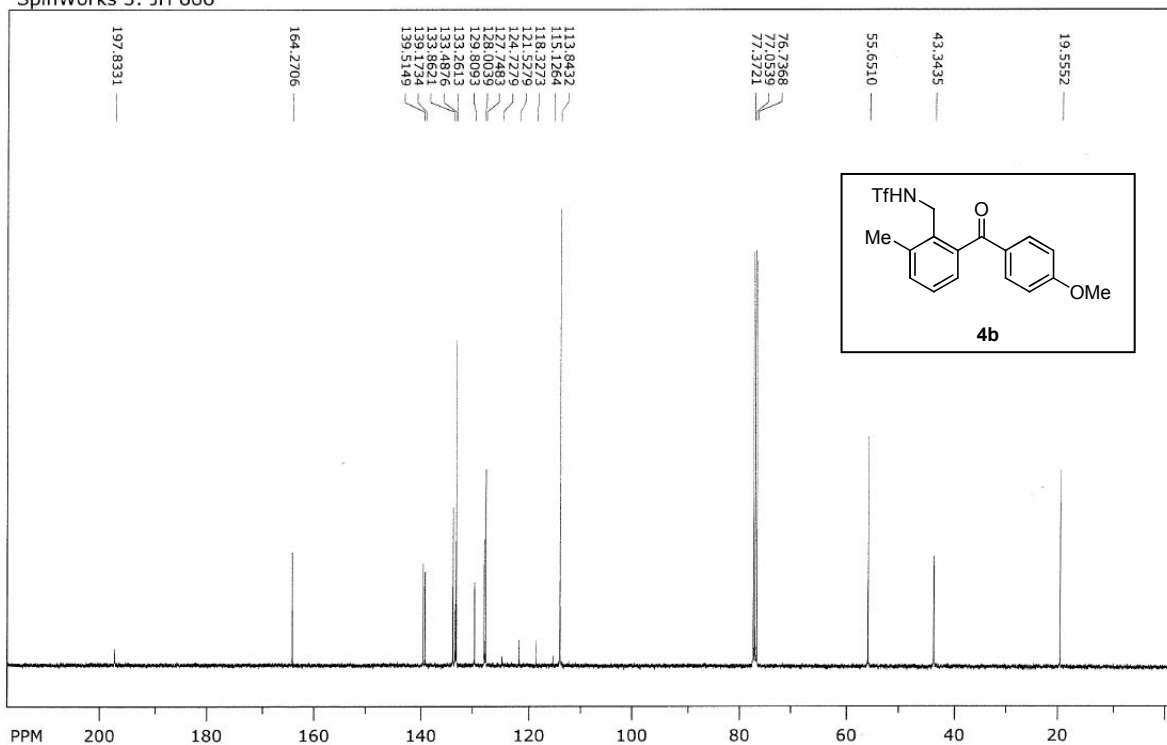

SpinWorks 3: JH 667

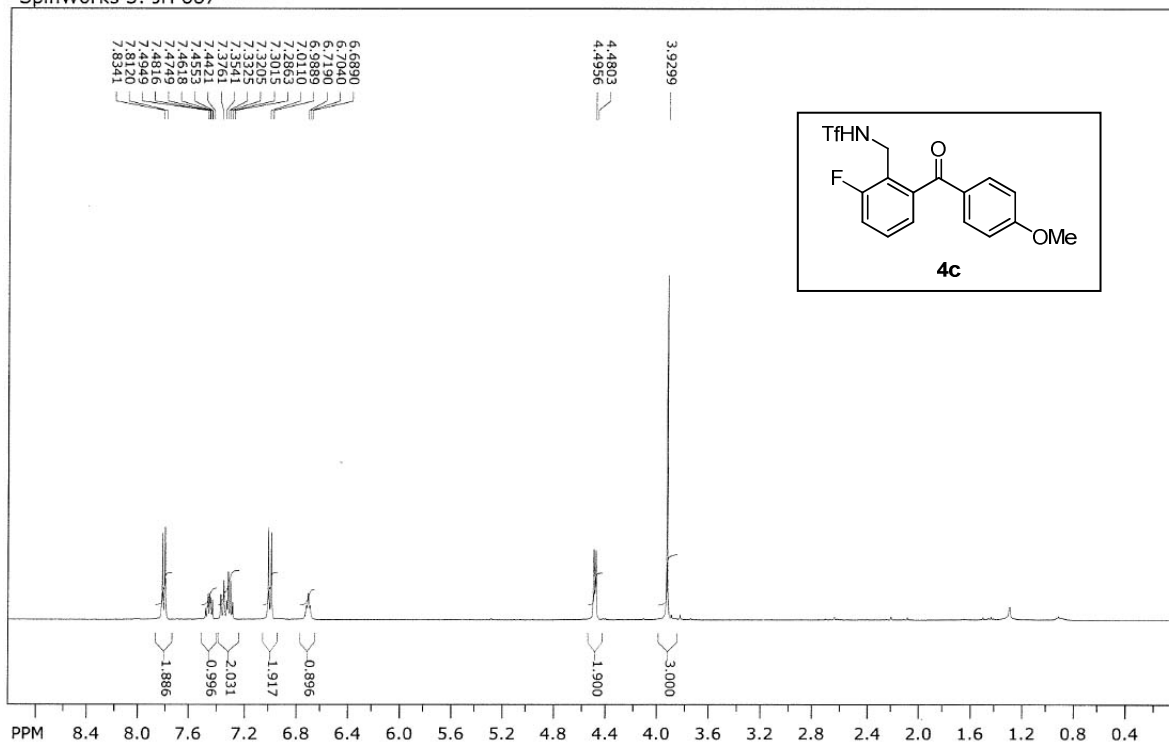

SpinWorks 3: JH 667

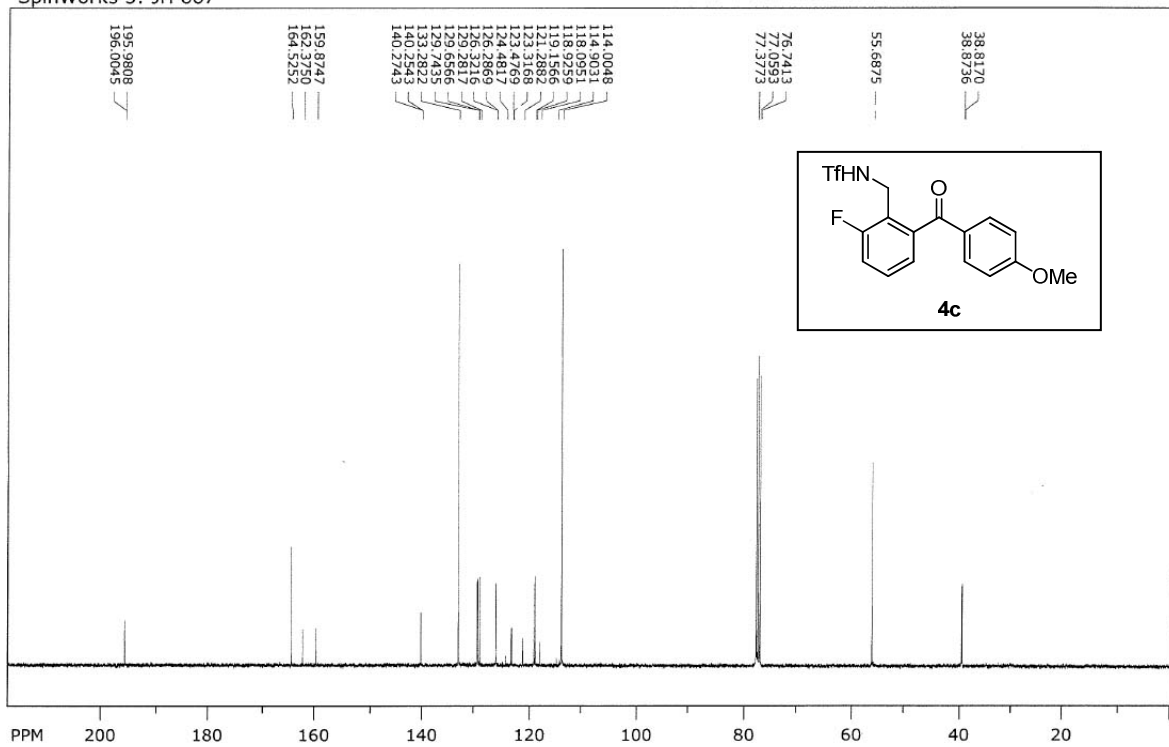

SpinWorks 3: JH 668

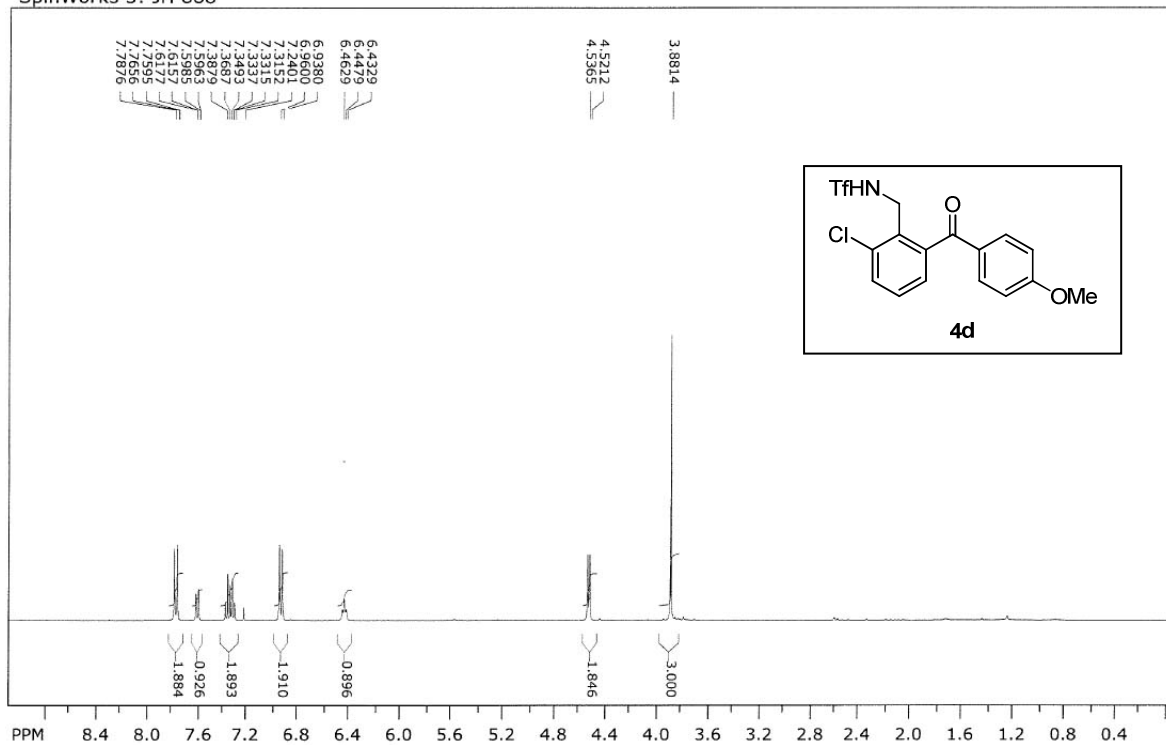

SpinWorks 3: JH 668

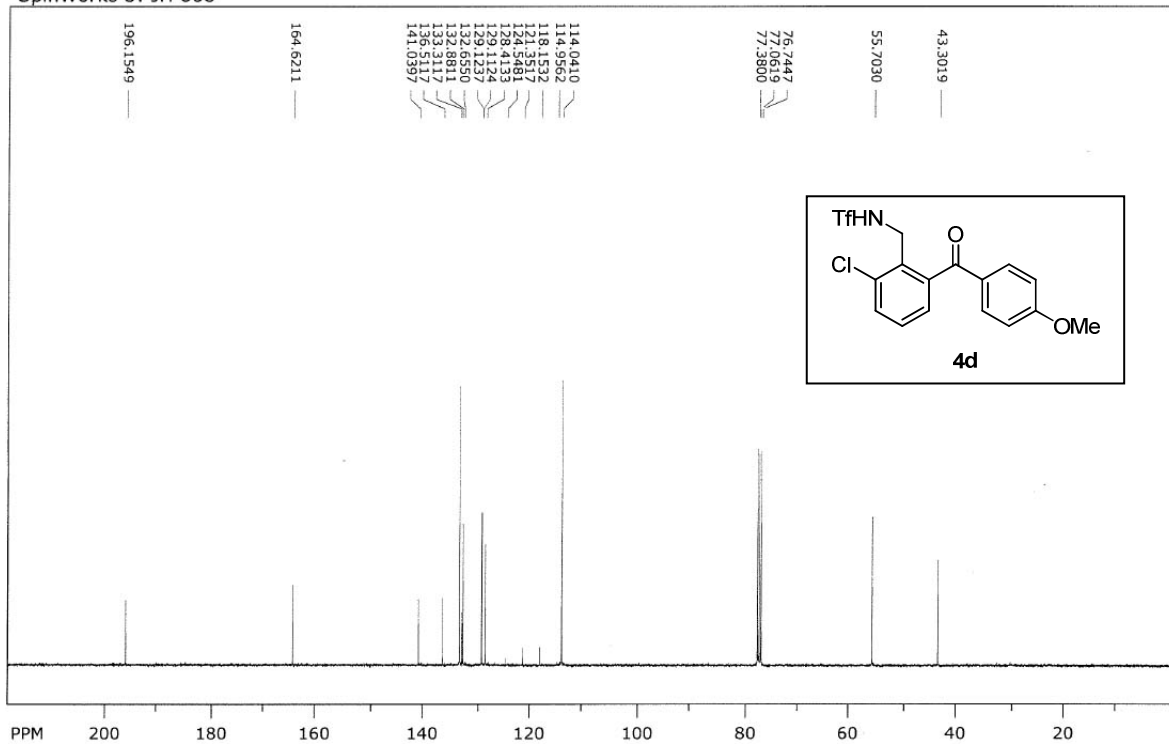

SpinWorks 3: JH 669

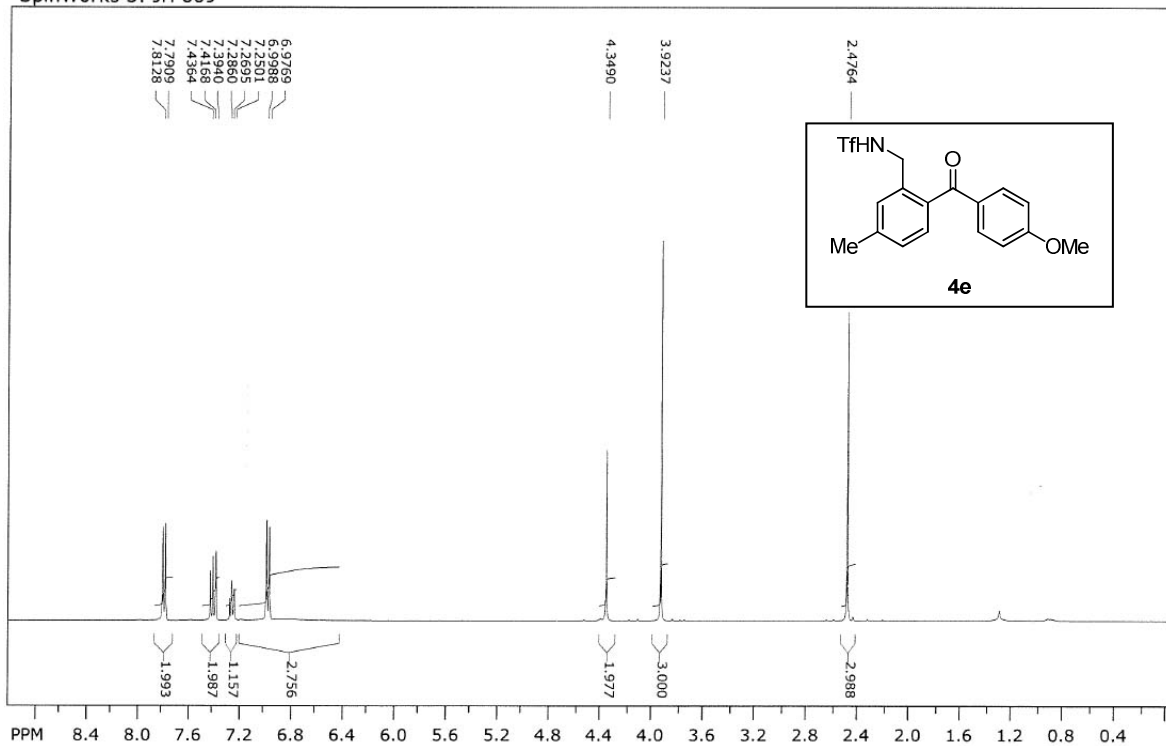

SpinWorks 3: JH 669

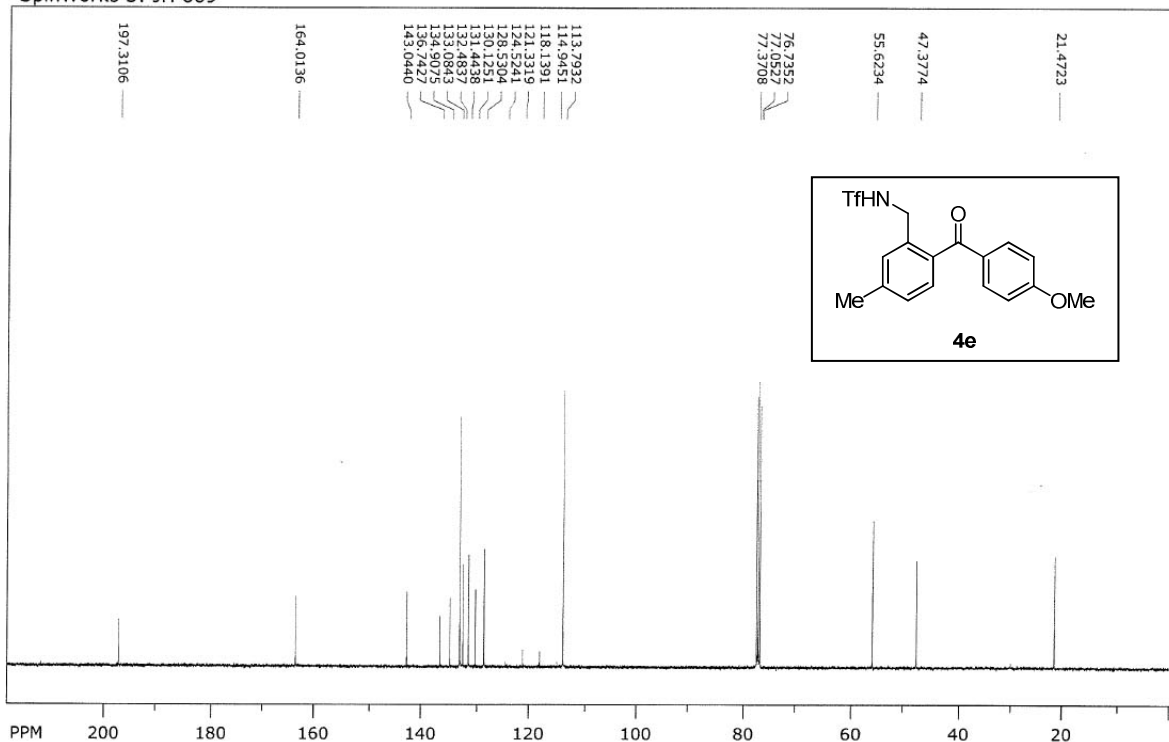

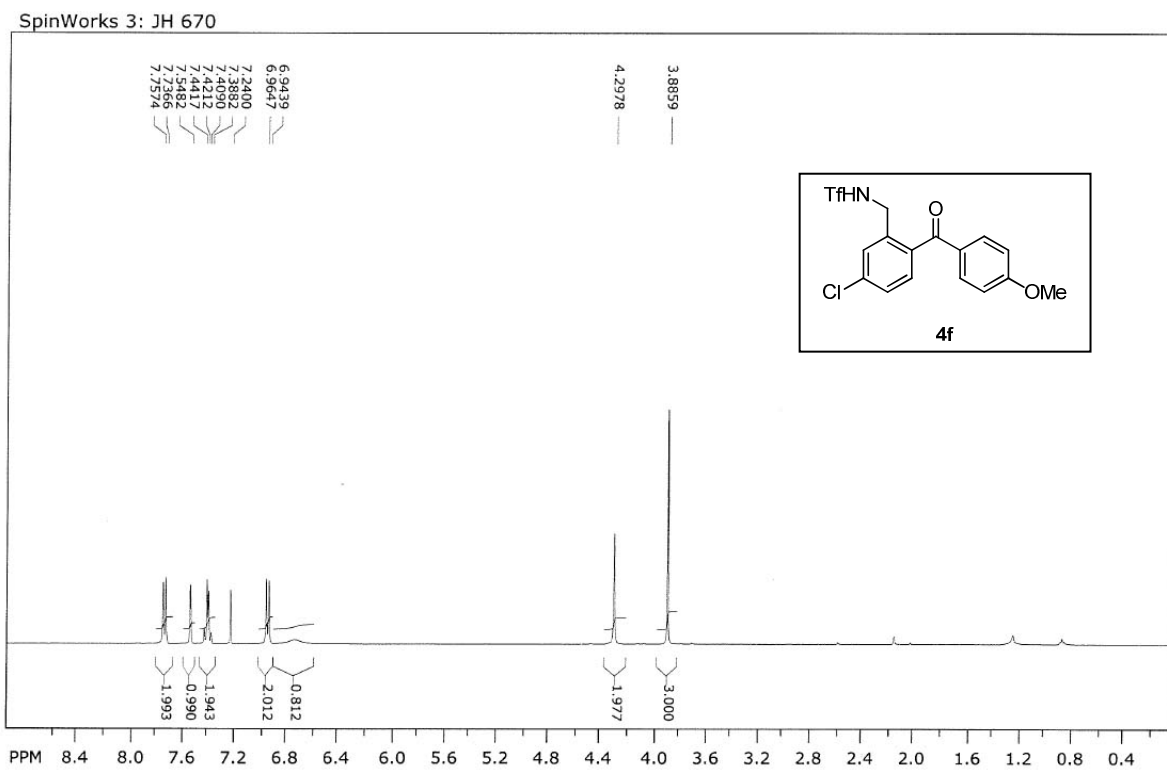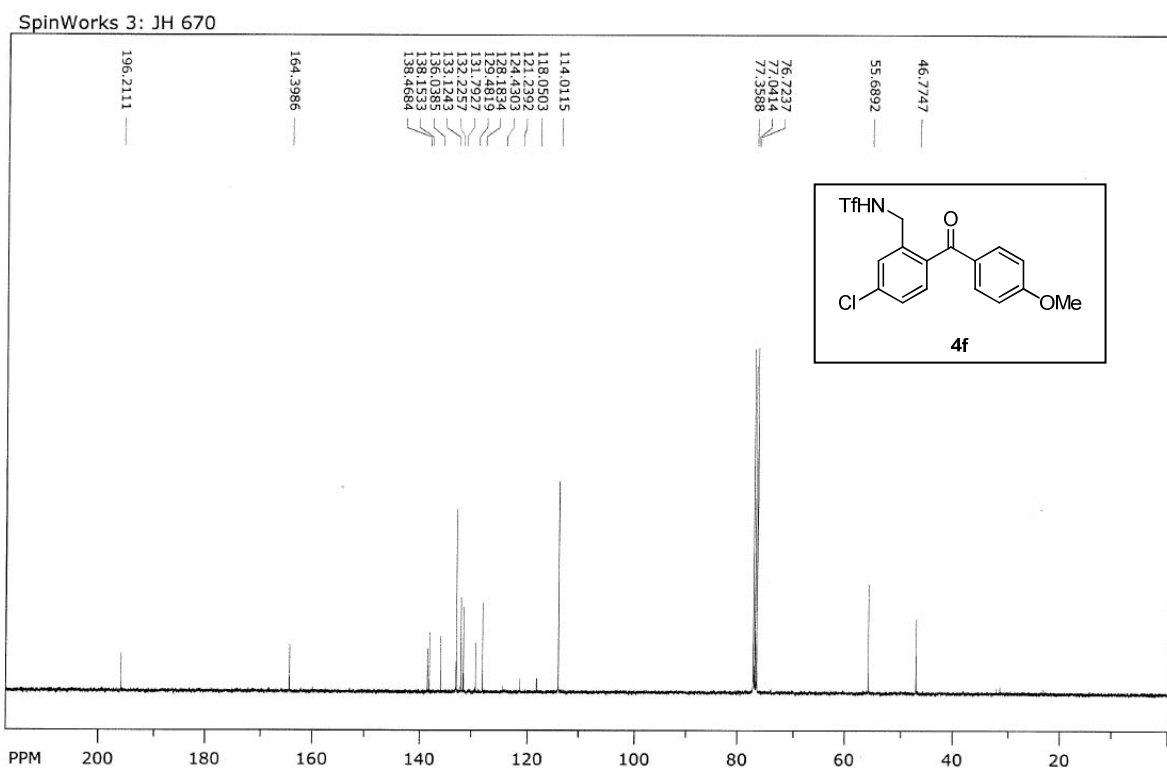



SpinWorks 3: JH 673

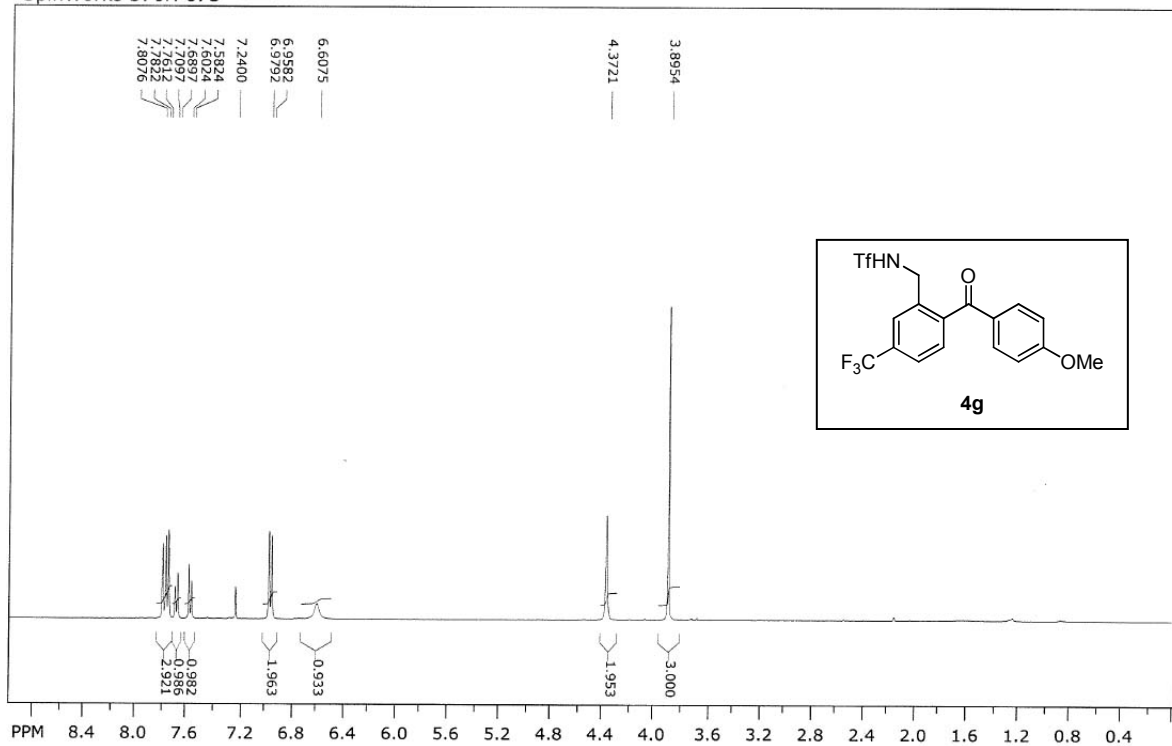

SpinWorks 3: JH 673

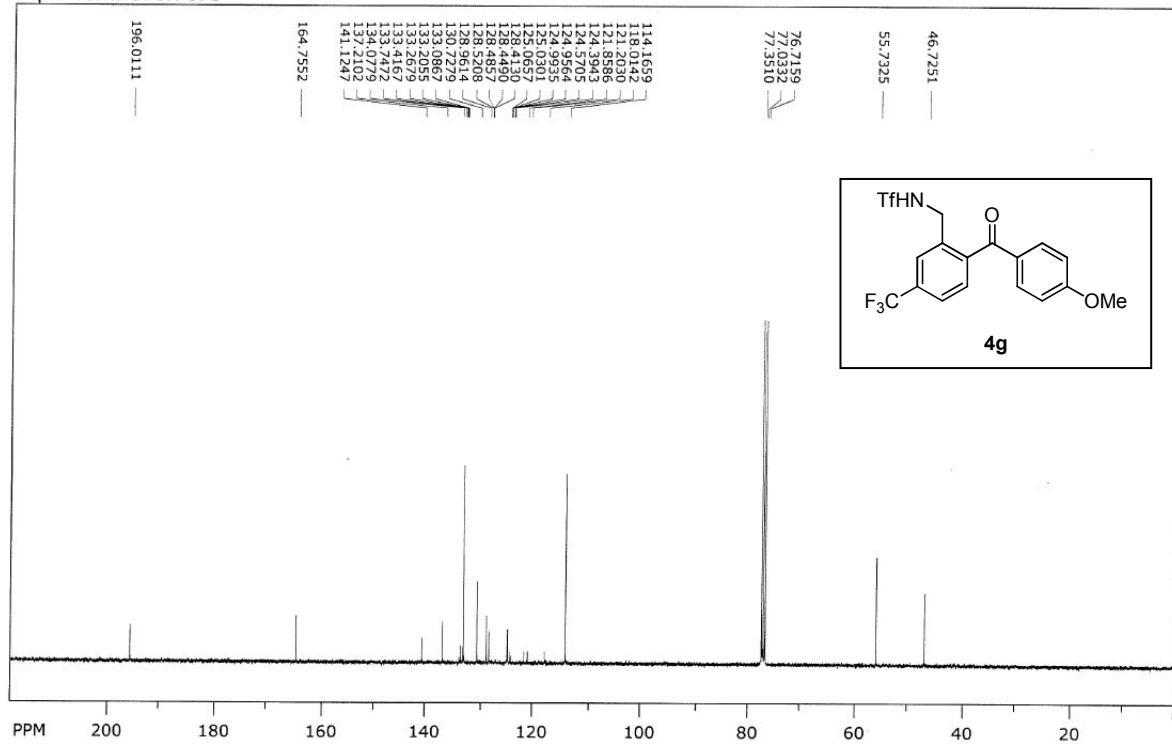

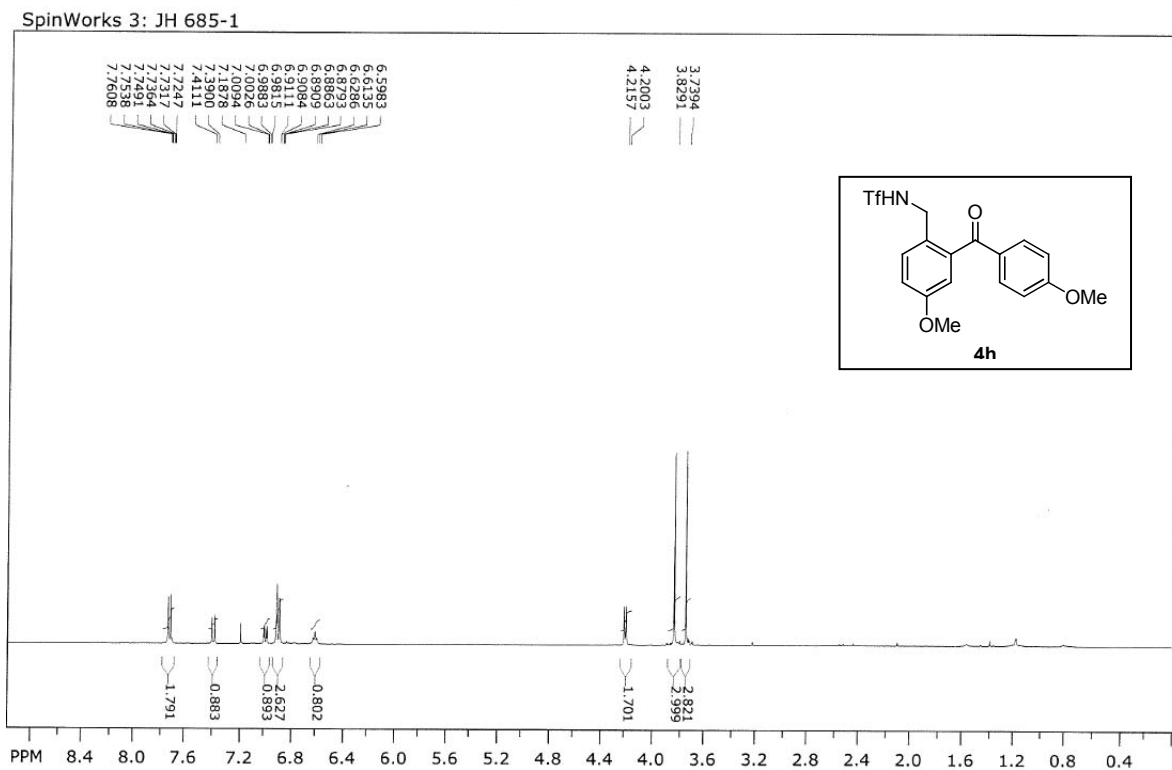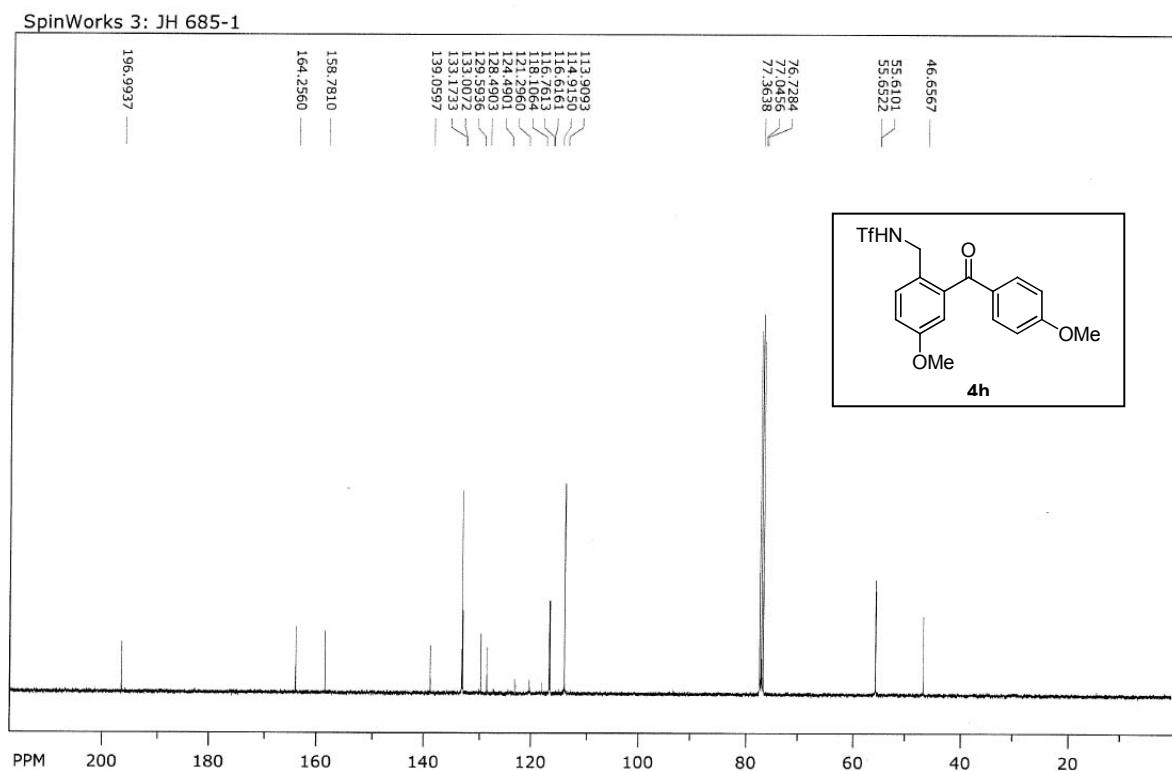

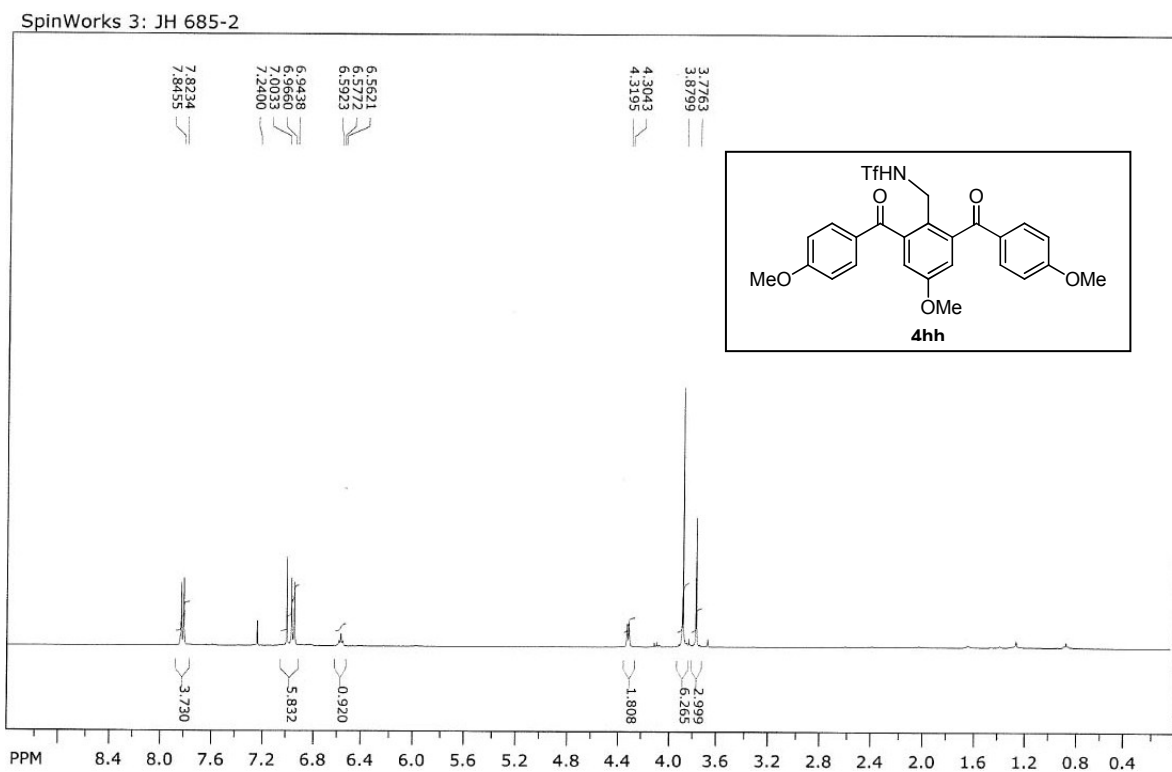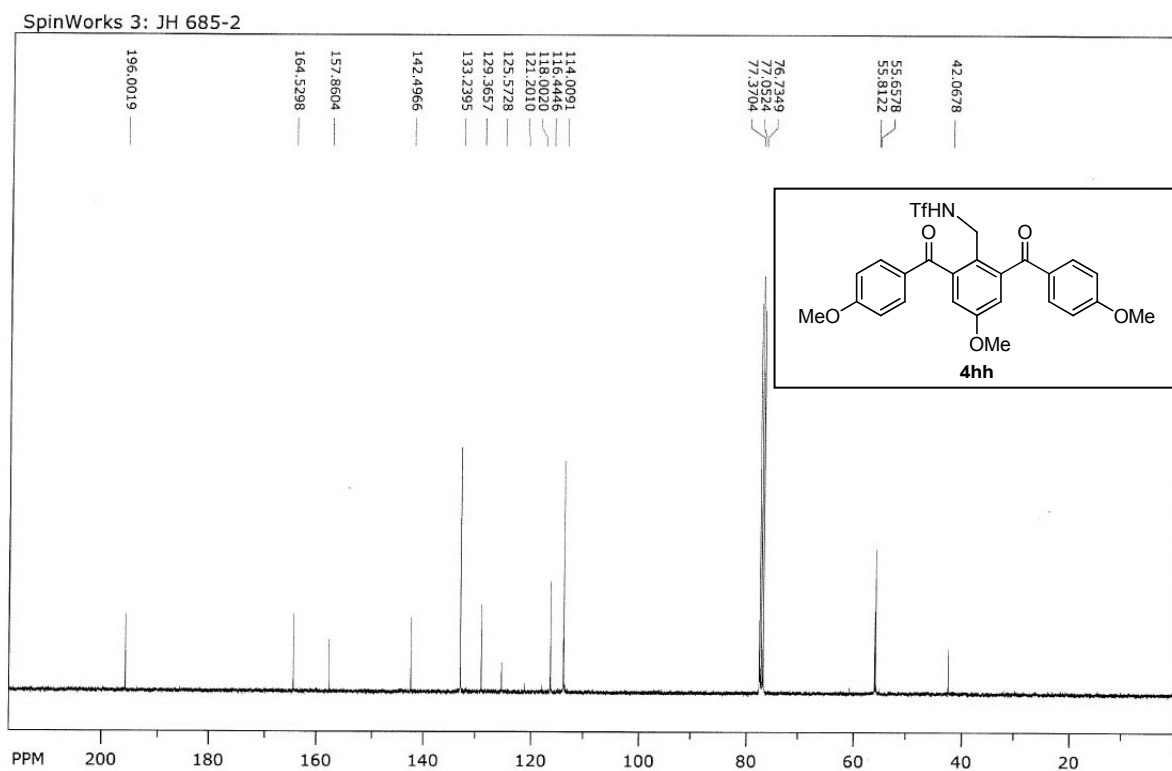

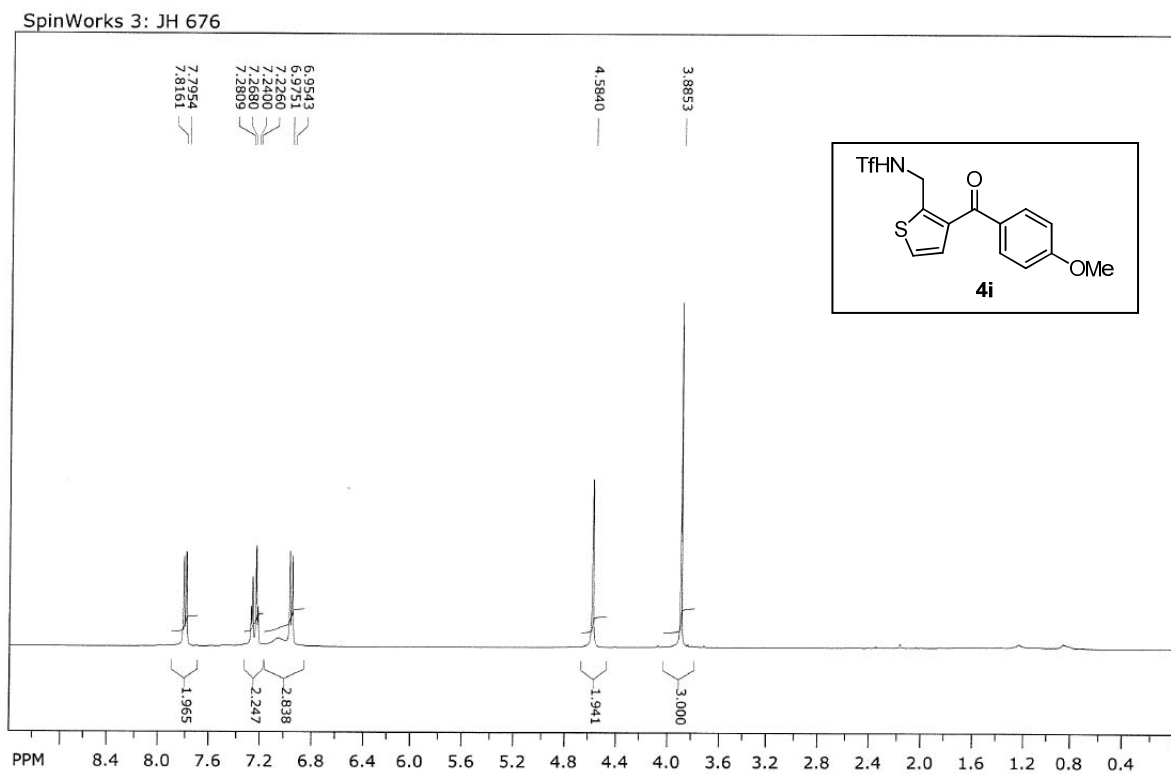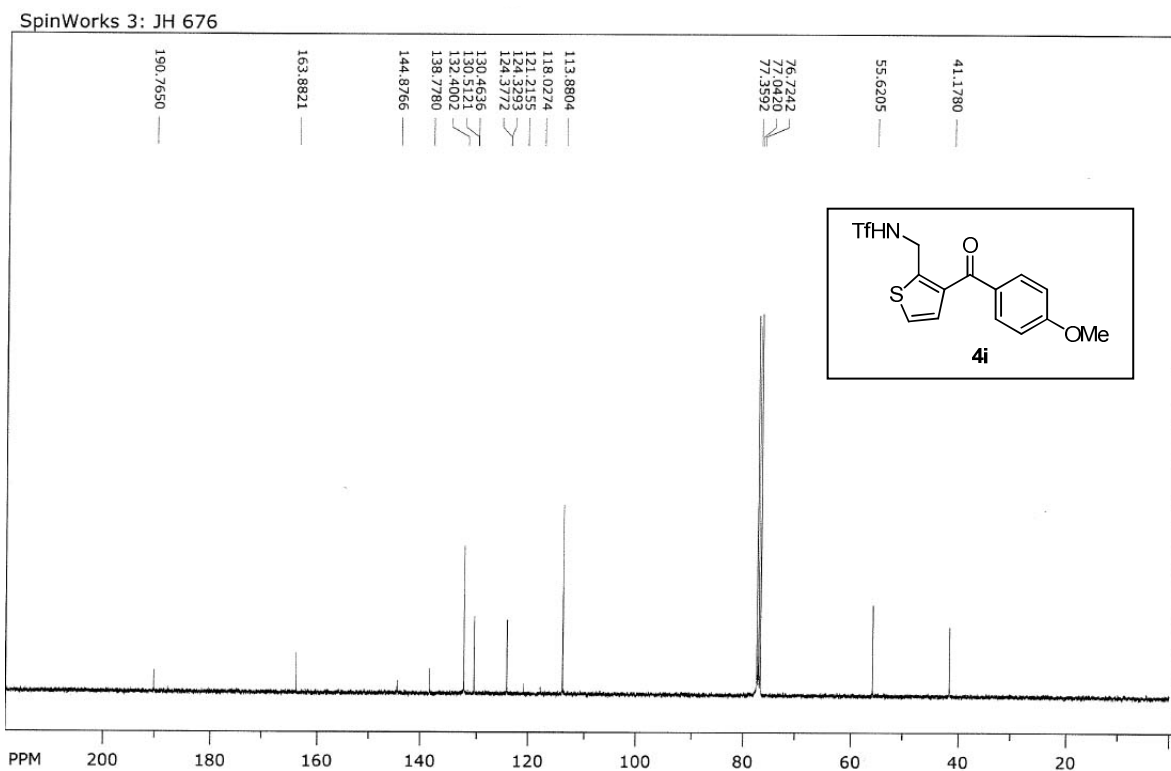

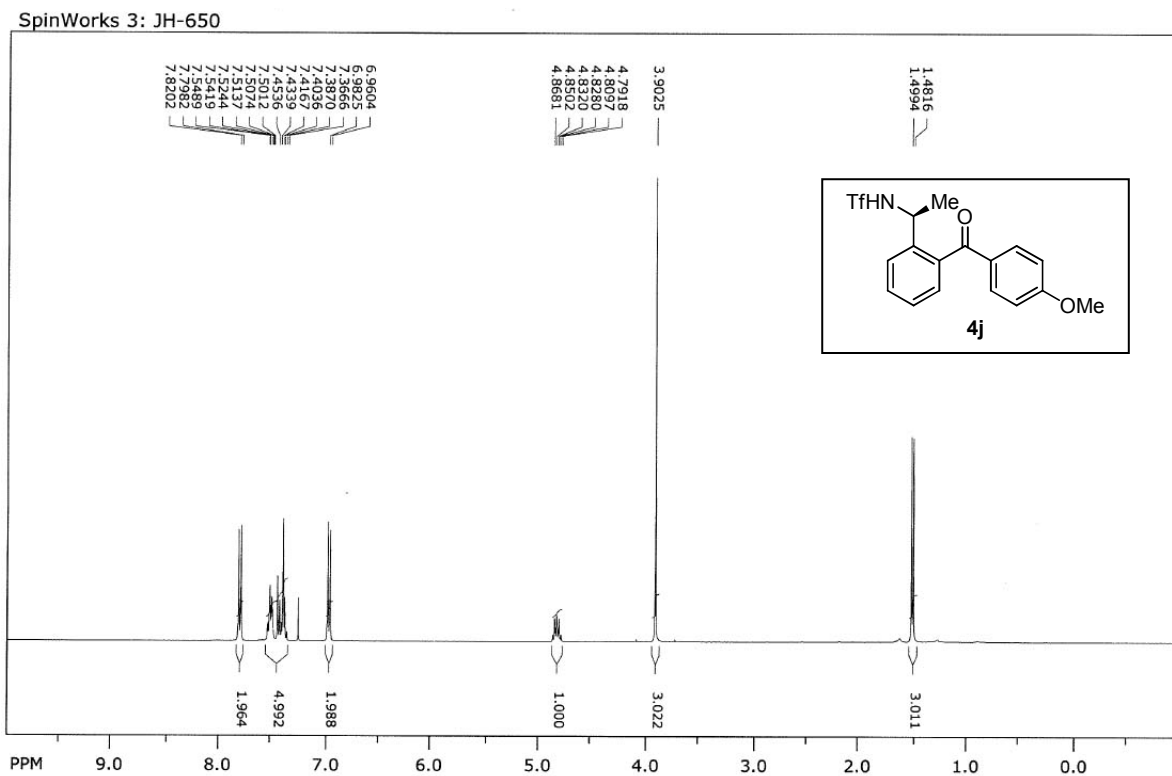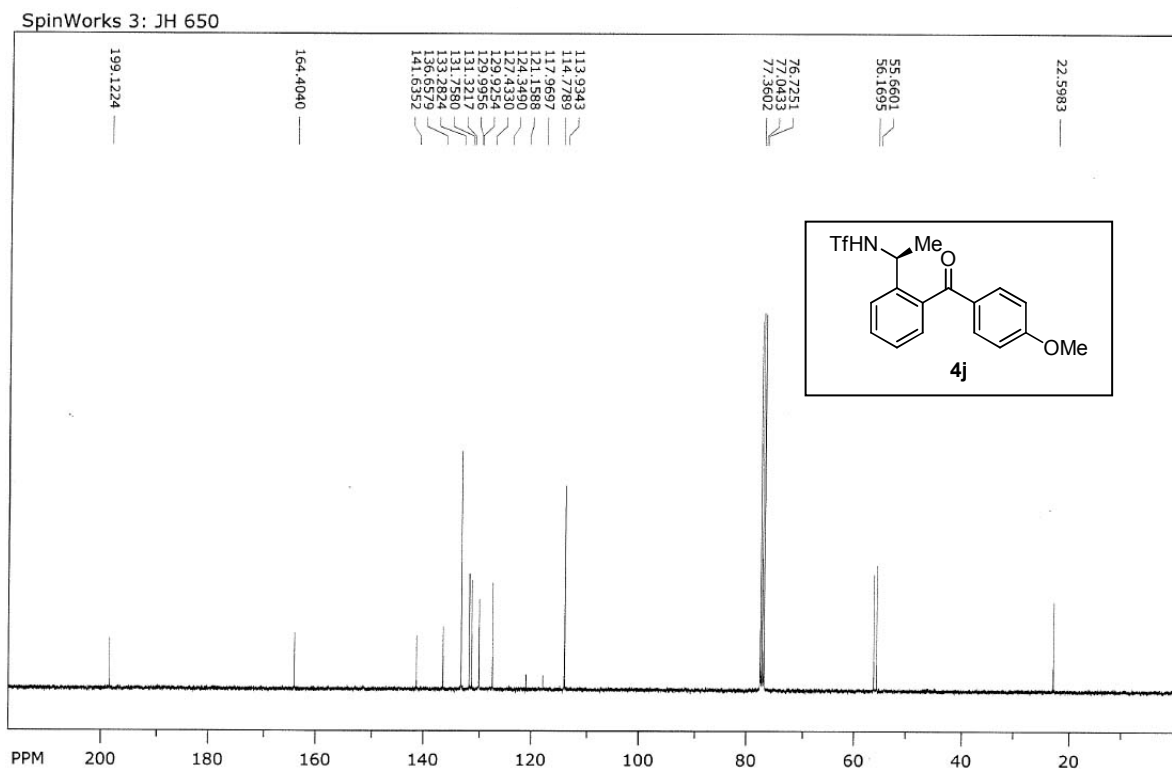

SpinWorks 3: AJ 423

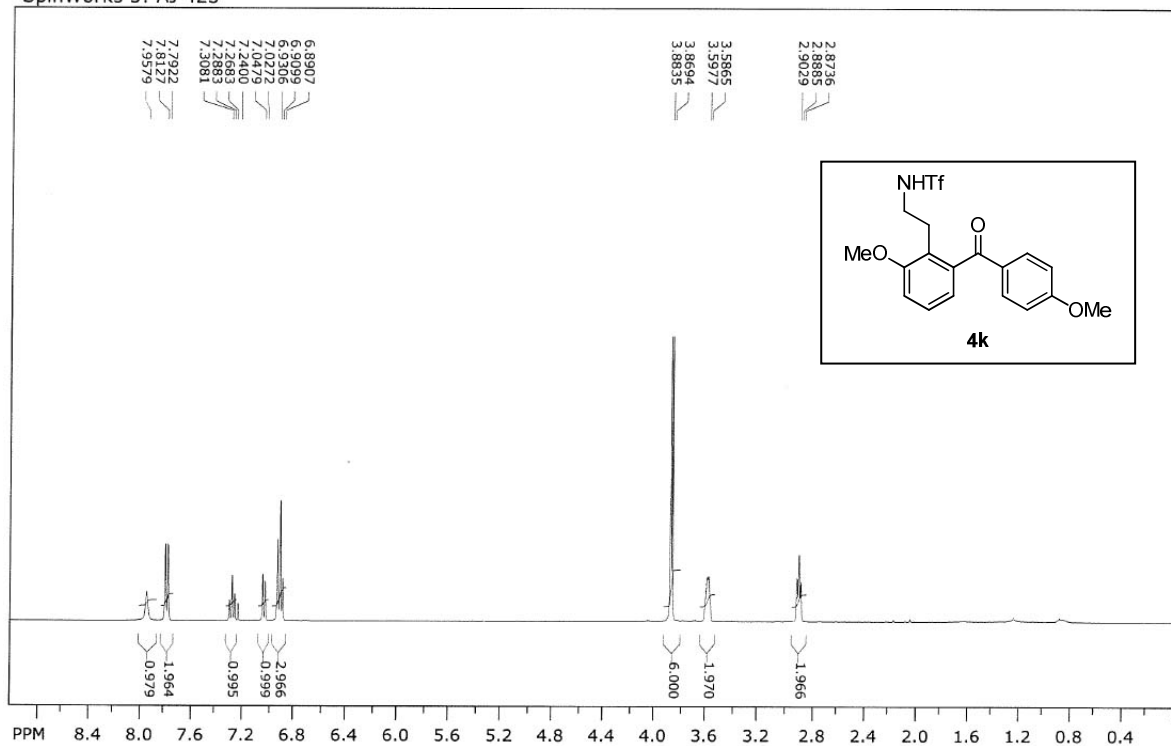

SpinWorks 3: AJ 423

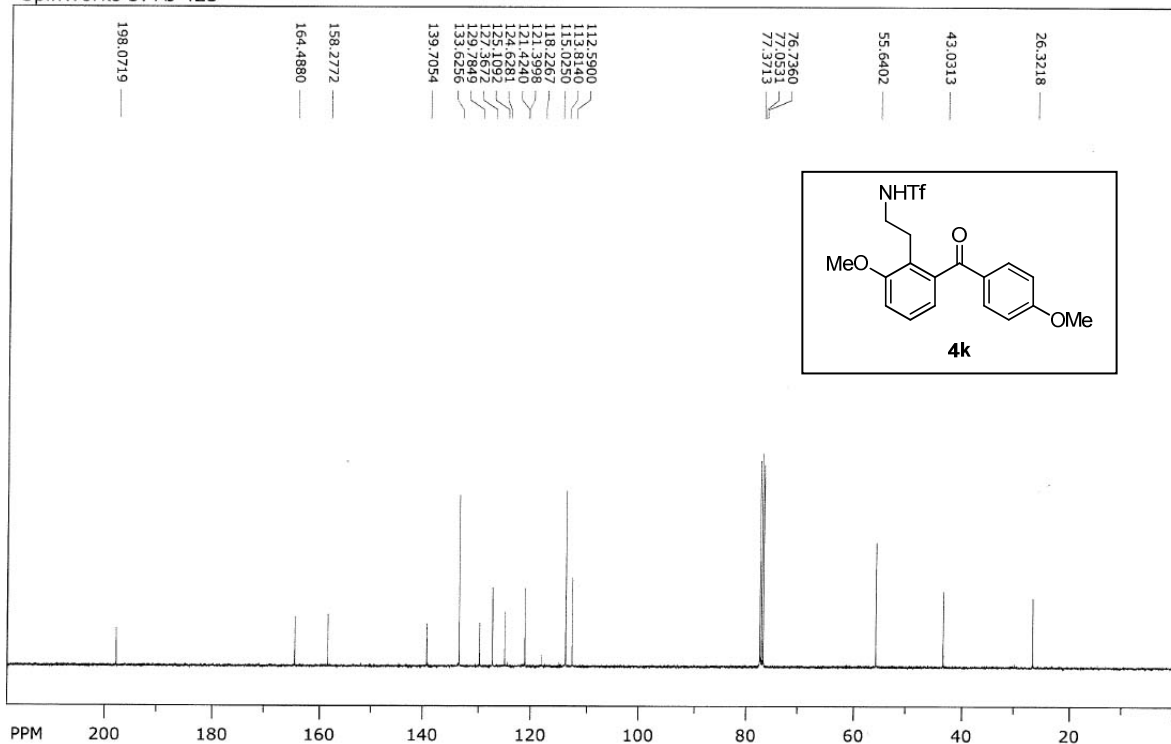

SpinWorks 3: AJ 425

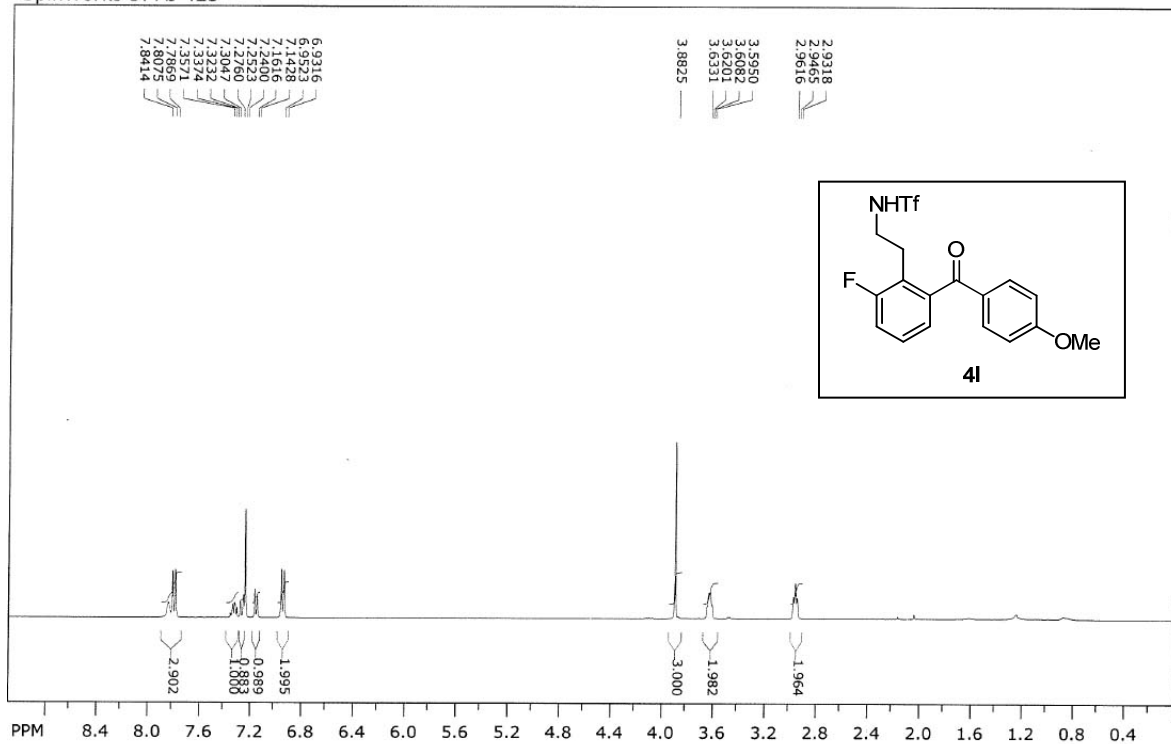

SpinWorks 3: AJ 425

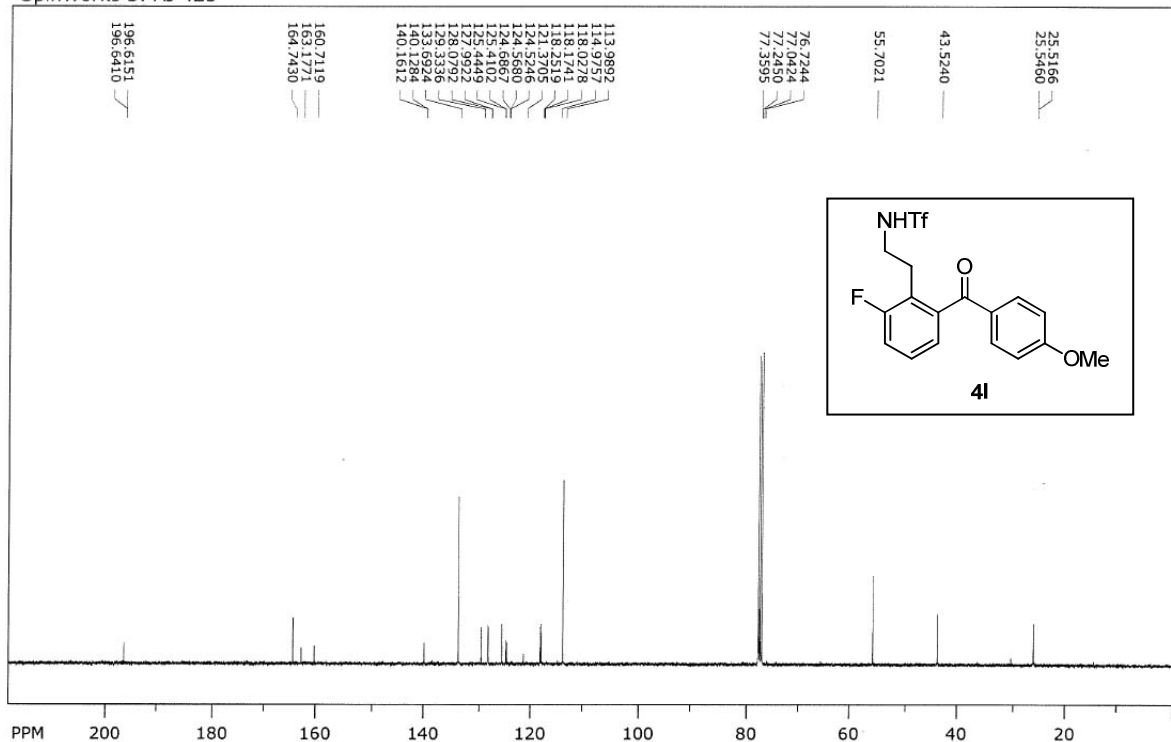

Supplement: c3ob40140e.pdf [file c3ob40140e.pdf]
